# Supplementary material for: First Report and Comparative Genomic Analysis of a Mycoplasma mycoides Subspecies capri HN-A in Hainan Island
Source: MDPI journal article supplement (doi:10.3390/microorganisms10101908), 2022-09-26
Supplement: s1 [file s1]

**A**

Venn diagram illustrating the overlap of protein families identified by four databases: COG (blue), KEGG (orange), NR (green), and Swiss-Prot (red). The counts for each region are as follows:

| Region                  | Count |
|-------------------------|-------|
| COG only                | 0     |
| KEGG only               | 0     |
| NR only                 | 252   |
| Swiss-Prot only         | 0     |
| COG & KEGG              | 0     |
| COG & NR                | 15    |
| COG & Swiss-Prot        | 40    |
| KEGG & NR               | 52    |
| KEGG & Swiss-Prot       | 10    |
| NR & Swiss-Prot         | 27    |
| COG & KEGG & NR         | 29    |
| COG & KEGG & Swiss-Prot | 0     |
| COG & NR & Swiss-Prot   | 0     |
| KEGG & NR & Swiss-Prot  | 0     |
| All four databases      | 418   |

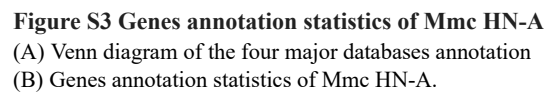

| Database          | Number of annotated genes |
|-------------------|---------------------------|
| GO                | 731                       |
| KEGG              | 509                       |
| COG               | 502                       |
| NR                | 843                       |
| Secretory_Protein | 57                        |
| Swiss-Prot        | 495                       |
| PHI               | 130                       |
| VFDB              | 15                        |
| CARD              | 38                        |
| T3SS              | 1                         |
| CAZy              | 92                        |

| Database          | Number of annotated genes |
|-------------------|---------------------------|
| GO                | 731                       |
| KEGG              | 509                       |
| COG               | 502                       |
| NR                | 843                       |
| Secretory_Protein | 57                        |
| Swiss-Prot        | 495                       |
| PHI               | 130                       |
| VFDB              | 15                        |
| CARD              | 38                        |
| T3SS              | 1                         |
| CAZy              | 92                        |
