# Supplementary material for: First Report and Comparative Genomic Analysis of a Mycoplasma mycoides Subspecies capri HN-A in Hainan Island
Source: MDPI journal article supplement (doi:10.3390/microorganisms10101908), 2022-09-26
Supplement: s1 [file s1]

**Figure S2. Variation type display diagram**

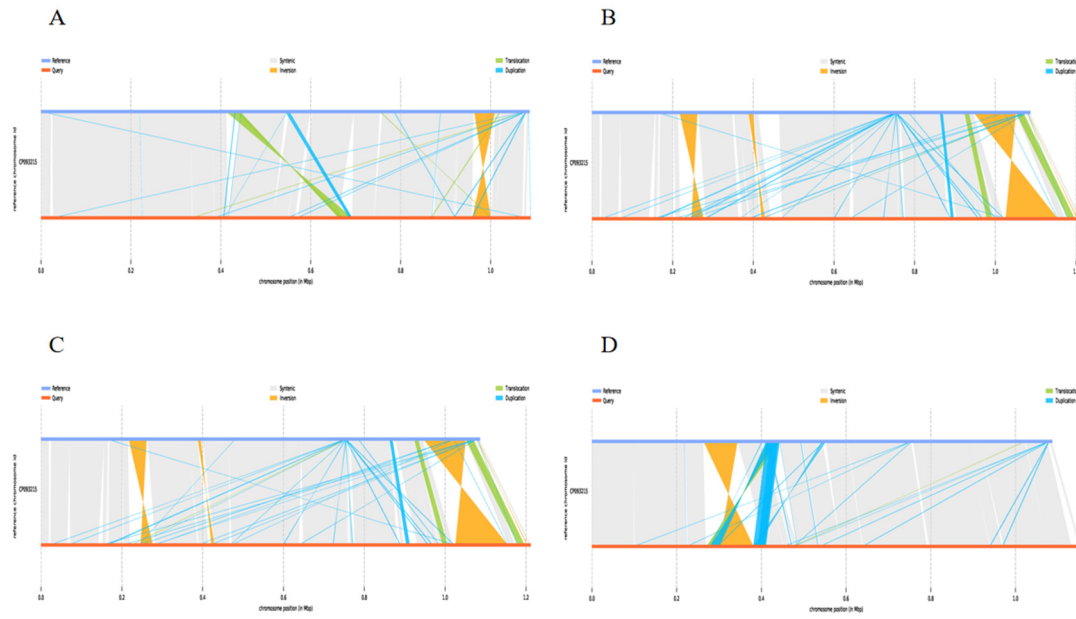

**Figure S2. Variation type display diagram**

- (A) Variation type display diagram of Mmc GM12 vs Mmc HN-A
- (B) Variation type display diagram of MmmSC PG1 vs Mmc HN-A
- (C) Variation type display diagram of Mmc Ker.TCR. LT vs Mmc HN-A
- (D) Variation type display diagram of MmmLC 95010 vs Mmc HN-A
