# Supplementary material for: First Report and Comparative Genomic Analysis of a Mycoplasma mycoides Subspecies capri HN-A in Hainan Island
Source: Microorganisms. 2022 Sep 26;10(10):1908. doi: 10.3390/microorganisms10101908 (PMC9607973; doi:10.3390/microorganisms10101908)
Supplement: Supplementary file 1 [file microorganisms-10-01908-s001.zip]

Archive with 15 entries (15 files):
- Figure S1. Annotation information of Mmc HN-A in four major databases.pdf
- Figure S2. Variation type display diagram.pdf
- Figure S3. Genes annotation statistics of Mmc HN-A.pdf
- Table S1.xlsx
- Table S10.xlsx
- Table S11.xlsx
- Table S12.xlsx
- Table S2.xlsx
- Table S3.xlsx
- Table S4.xlsx
- Table S5.xlsx
- Table S6.xlsx
- Table S7.xlsx
- Table S8.xlsx
- Table S9.xlsx
