# Supplementary material for: First Report and Comparative Genomic Analysis of a Mycoplasma mycoides Subspecies capri HN-A in Hainan Island
Source: Microorganisms. 2022 Sep 26;10(10):1908. doi: 10.3390/microorganisms10101908 (PMC9607973; doi:10.3390/microorganisms10101908)
Supplement: Supplementary file 1 [file microorganisms-10-01908-s001.zip › Table S1.xlsx]

## Sheet: HN-A.TransposonPSI
Table S1. Transposons in Mmc HN-A
ID	Type	Chr	Star	End	Strand
chain00001	ltr_Roo	CP093215	32710	33561	+
chain00002	TY1_Copia	CP093215	319111	320475	+
chain00003	helitronORF	CP093215	448842	449222	+
