# Supplementary material for: First Report and Comparative Genomic Analysis of a Mycoplasma mycoides Subspecies capri HN-A in Hainan Island
Source: Microorganisms. 2022 Sep 26;10(10):1908. doi: 10.3390/microorganisms10101908 (PMC9607973; doi:10.3390/microorganisms10101908)
Supplement: Supplementary file 1 [file microorganisms-10-01908-s001.zip › Table S2.xlsx]

## Sheet: CRISPRs
Table S2. The potential CRISPRs in Mmc HN-A
Crispr_Id	CRISPR_Start	CRISPR_End	CRISPR_Length	Potential_Orientation	Consensus_Repeat	Repeat_Length	Spacers_Nb
Crispr_1	156841	157093	252	Unknown	TACATTTTTTGTATTTCAATTTGATAAA	28	3
Crispr_2	596739	596833	94	Unknown	TTCTTCAACTCAATGTTCTGTACTTA	26	1
Crispr_3	606726	606906	180	Unknown	TGAGATACTTCAAATGTTACAGATATGA	28	2
Crispr_4	930806	930952	146	Unknown	TTTGAAACTGGAGTAGCACCAACTACACTAGCGTTTTCTTCAACT	45	1
Crispr_5	973193	973373	180	Forward	TAAGGAAAAAGTGTGTAAATACACAGAAATTCCTT	35	2
