# Supplementary material for: First Report and Comparative Genomic Analysis of a Mycoplasma mycoides Subspecies capri HN-A in Hainan Island
Source: Microorganisms. 2022 Sep 26;10(10):1908. doi: 10.3390/microorganisms10101908 (PMC9607973; doi:10.3390/microorganisms10101908)
Supplement: Supplementary file 1 [file microorganisms-10-01908-s001.zip › Table S3.xlsx]

## Sheet: Sheet1
Table S3.Intersection of four database annotation results for Mmc HN-A
ID	Symbol	Nr-ID	Swissprot-ID	COG-ID	KO-ID
MNF30_00005	HI_1038	WP_107669952.1	sp|P44099|Y1038_HAEIN	COG1373	K07133//K07133; uncharacterized protein
MNF30_00015	MPN_289	VZR75777.1	sp|P75488|T1SZ_MYCPN	COG0732	K01154//hsdS; type I restriction enzyme, S subunit [EC:3.1.21.3]
MNF30_00025	hsdR	WP_046783824.1	sp|Q5HK76|HSDR_STAEQ	COG0610	K01153//hsdR; type I restriction enzyme, R subunit [EC:3.1.21.3]
MNF30_00030	MPN_289	WP_011949726.1	sp|P75488|T1SZ_MYCPN	COG0732	K01154//hsdS; type I restriction enzyme, S subunit [EC:3.1.21.3]
MNF30_00035	MPN_342	WP_036428364.1	sp|P75436|T1MD_MYCPN	COG0286	K03427//hsdM; type I restriction enzyme M protein [EC:2.1.1.72]
MNF30_00040	polA	WP_011166301.1	sp|O34996|DPO1_BACSU	COG0258	K02335//polA; DNA polymerase I [EC:2.7.7.7]
MNF30_00050	secA	WP_013729243.1	sp|Q6MUE3|SECA_MYCMS	COG0653	K03070//secA; preprotein translocase subunit SecA [EC:7.4.2.8]
MNF30_00110	rpsT	Q6MUE6.2	sp|Q6MUE6|RS20_MYCMS	COG0268	K02968//RP-S20; small subunit ribosomal protein S20
MNF30_00115	mnmE	WP_020862479.1	sp|Q2SR47|MNME_MYCCT	COG0486	K03650//mnmE; tRNA modification GTPase [EC:3.6.-.-]
MNF30_00125	tsaD	WP_017698210.1	sp|Q2SR45|TSAD_MYCCT	COG0533	K01409//KAE1; N6-L-threonylcarbamoyladenine synthase [EC:2.3.1.234]
MNF30_00130	yqkD	WP_013729226.1	sp|P54567|YQKD_BACSU	COG1073	K06889//K06889; uncharacterized protein
MNF30_00140	asnS	WP_013729224.1	sp|Q2SR42|SYN_MYCCT	COG0017	K01893//NARS; asparaginyl-tRNA synthetase [EC:6.1.1.22]
MNF30_00150	phnC	WP_020862474.1	sp|Q6MUF4|PHNC_MYCMS	COG3638	K02041//phnC; phosphonate transport system ATP-binding protein [EC:7.3.2.2]
MNF30_00160	rec2	CBW53791.1	sp|P44408|REC2_HAEIN	COG2333	K02238//comEC; competence protein ComEC
MNF30_00195	trxA	WP_017698202.1	sp|O84544|THIO_CHLTR	COG0526	K03671//trxA; thioredoxin 1
MNF30_00200	lysS	WP_020862469.1	sp|Q6MUG2|SYK_MYCMS	COG1190	K04567//KARS; lysyl-tRNA synthetase, class II [EC:6.1.1.6]
MNF30_00205	dus1	WP_020862468.1	sp|P37567|DUS1_BACSU	COG0042	K05540//dusB; tRNA-dihydrouridine synthase B [EC:1.-.-.-]
MNF30_00215	serS	WP_017698199.1	sp|Q6MUG5|SYS_MYCMS	COG0172	K01875//SARS; seryl-tRNA synthetase [EC:6.1.1.11]
MNF30_00225	ald	WP_026133653.1	sp|Q4L750|DHA_STAHJ	COG0686	K00259//ald; alanine dehydrogenase [EC:1.4.1.1]
MNF30_00240	ygaF	WP_013729207.1	sp|Q796Y8|BCP_BACSU	COG1225	K03564//BCP; peroxiredoxin Q/BCP [EC:1.11.1.15]
MNF30_00265	guaC	WP_013729203.1	sp|Q6MUI1|GUAC_MYCMS	COG0516	K00364//E1.7.1.7; GMP reductase [EC:1.7.1.7]
MNF30_00280	dnaX	WP_013729201.1	sp|P47658|DPO3X_MYCGE	COG2812	K02343//dnaX; DNA polymerase III subunit gamma/tau [EC:2.7.7.7]
MNF30_00285	recR	WP_026133651.1	sp|A0ZZN6|RECR_BIFAA	COG0353	K06187//recR; recombination protein RecR
MNF30_00290	tmk	WP_017698186.1	sp|Q6MUI5|KTHY_MYCMS	COG0125	K00943//tmk; dTMP kinase [EC:2.7.4.9]
MNF30_00295	holB	WP_020862451.1	sp|Q89AG8|HOLB_BUCBP	COG0470	K02341//holB; DNA polymerase III subunit delta' [EC:2.7.7.7]
MNF30_00310	tilS	WP_011166253.1	sp|Q6MUI9|TILS_MYCMS	COG0037	K04075//tilS; tRNA(Ile)-lysidine synthase [EC:6.3.4.19]
MNF30_00320	ftsH	WP_017698180.1	sp|Q6F0E5|FTSH_MESFL	COG0465	K03798//ftsH; cell division protease FtsH [EC:3.4.24.-]
MNF30_00335	hgdH	WP_017698177.1	sp|D2RJU7|HGDH_ACIFV	COG1052	K03778//ldhA; D-lactate dehydrogenase [EC:1.1.1.28]
MNF30_00360	hslO	WP_020862439.1	sp|Q97GJ6|HSLO_CLOAB	COG1281	K04083//hslO; molecular chaperone Hsp33
MNF30_00370	azoR	WP_013729183.1	sp|Q6MUK2|AZOR_MYCMS	COG1182	K01118//acpD; FMN-dependent NADH-azoreductase [EC:1.7.1.17]
MNF30_00375	cspA	WP_013729182.1	sp|Q9S1B7|CSPA_SHEVD	COG1278	K03704//cspA; cold shock protein
MNF30_00380	rpsF	WP_013729181.1	sp|Q6MUK4|RS6_MYCMS	COG0360	K02990//RP-S6; small subunit ribosomal protein S6
MNF30_00385	ssb2	WP_011166237.1	sp|Q8Y4X1|SSB2_LISMO	COG0629	K03111//ssb; single-strand DNA-binding protein
MNF30_00390	rpsR	WP_011166236.1	sp|Q6MUK6|RS18_MYCMS	COG0238	K02963//RP-S18; small subunit ribosomal protein S18
MNF30_00400	mtlA	WP_017698168.1	sp|P50852|PTMCB_GEOSE	COG2213	K02800//mtlA; mannitol PTS system EIICBA or EIICB component [EC:2.7.1.197]
MNF30_00405	srlD	WP_011166231.1	sp|P05707|SRLD_ECOLI	COG1028	K00068//srlD; sorbitol-6-phosphate 2-dehydrogenase [EC:1.1.1.140]
MNF30_00410	mtlF	WP_014584321.1	sp|Q9K680|PTMA_BACHD	COG4668	K02798//cmtB; mannitol PTS system EIIA component [EC:2.7.1.197]
MNF30_00420	mtlD	WP_020862433.1	sp|P55800|MTLD_MYCMS	COG0246	K00009//mtlD; mannitol-1-phosphate 5-dehydrogenase [EC:1.1.1.17]
MNF30_00445	metG	WP_036455523.1	sp|Q8XHG1|SYM_CLOPE	COG0143	K01874//MARS; methionyl-tRNA synthetase [EC:6.1.1.10]
MNF30_00455	nupA	WP_013729168.1	sp|A2RKA7|NUPA_LACLM	COG3845	K23537//nupA; general nucleoside transport system ATP-binding protein
MNF30_00460	nupB	WP_017698153.1	sp|A2RKA6|NUPB_LACLM	COG4603	K23535//nupB; general nucleoside transport system permease protein
MNF30_00465	MG121	WP_017698152.1	sp|P47367|Y121_MYCGE	COG1079	K23536//nupC; general nucleoside transport system permease protein
MNF30_00470	gyrA	WP_020862422.1	sp|Q5HK04|GYRA_STAEQ	COG0188	K02469//gyrA; DNA gyrase subunit A [EC:5.6.2.2]
MNF30_00475	gyrB	WP_020862421.1	sp|P34031|GYRB_SPICI	COG0187	K02470//gyrB; DNA gyrase subunit B [EC:5.6.2.2]
MNF30_00485	rsmA	WP_020862419.1	sp|Q6MUM4|RSMA_MYCMS	COG0030	K02528//ksgA; 16S rRNA (adenine1518-N6/adenine1519-N6)-dimethyltransferase [EC:2.1.1.182]
MNF30_00490	rnmV	WP_036431584.1	sp|P43041|RNM5_MYCCT	COG1658	K05985//rnmV; ribonuclease M5 [EC:3.1.26.8]
MNF30_00495	dnaN	WP_013729160.1	sp|P24117|DPO3B_MYCCT	COG0592	K02338//dnaN; DNA polymerase III subunit beta [EC:2.7.7.7]
MNF30_00500	dnaA	WP_080511156.1	sp|Q6MUM7|DNAA_MYCMS	COG0593	K02313//dnaA; chromosomal replication initiator protein
MNF30_00505	rpmH	WP_013730013.1	sp|P33249|RL34_MYCCT	COG0230	K02914//RP-L34; large subunit ribosomal protein L34
MNF30_00510	rnpA	WP_020863082.1	sp|Q6MRS3|RNPA_MYCMS	COG0594	K03536//rnpA; ribonuclease P protein component [EC:3.1.26.5]
MNF30_00515	yidC	WP_020863081.1	sp|P43042|YIDC_MYCCT	COG0706	K03217//yidC; YidC/Oxa1 family membrane protein insertase
MNF30_00620	mnmG1	WP_015545387.1	sp|Q6MRU5|MNMG_MYCMS	COG0445	K03495//gidA; tRNA uridine 5-carboxymethylaminomethyl modification enzyme
MNF30_00630	asnA	WP_011167158.1	sp|P58824|ASNA_FUSNN	COG2502	K01914//asnA; aspartate--ammonia ligase [EC:6.3.1.1]
MNF30_00650	mgtA	WP_017698119.1	sp|P0ABB9|ATMA_ECO57	COG0474	K01531//mgtA; P-type Mg2+ transporter [EC:7.2.2.14]
MNF30_00670	pgsA	ACU78217.1	sp|P46322|PGSA_BACSU	COG0558	K00995//pgsA; CDP-diacylglycerol---glycerol-3-phosphate 3-phosphatidyltransferase [EC:2.7.8.5]
MNF30_00675	rsmG	WP_017698115.1	sp|Q48960|RSMG_MYCCT	COG0357	K03501//gidB; 16S rRNA (guanine527-N7)-methyltransferase [EC:2.1.1.170]
MNF30_00685	ychF	WP_017698114.1	sp|P37518|YCHF_BACSU	COG0012	K06942//ychF; ribosome-binding ATPase
MNF30_00730	MPN_334	WP_013729964.1	sp|P75444|Y334_MYCPN	COG1131	K01990//ABC-2.A; ABC-2 type transport system ATP-binding protein
MNF30_00760	topA	WP_017698104.1	sp|P55991|TOP1_HELPY	COG0550	K03168//topA; DNA topoisomerase I [EC:5.6.2.1]
MNF30_00770	recG	WP_107669357.1	sp|O50224|RECG_ACIFR	COG2865	K03655//recG; ATP-dependent DNA helicase RecG [EC:3.6.4.12]
MNF30_00775	ptsG	WP_013729955.1	sp|P20166|PTG3C_BACSU	COG1263	K02791//malX; maltose/glucose PTS system EIICB component [EC:2.7.1.199 2.7.1.208]
MNF30_00810	whiA	WP_013729947.1	sp|Q38Y99|WHIA_LACSS	COG1481	K09762//K09762; uncharacterized protein
MNF30_00815	lgt	CBW54580.1	sp|Q8CX97|LGT_OCEIH	COG0682	K13292//lgt; phosphatidylglycerol---prolipoprotein diacylglyceryl transferase [EC:2.5.1.145]
MNF30_00820	trxB	WP_026133645.1	sp|P80880|TRXB_BACSU	COG0492	K00384//trxB; thioredoxin reductase (NADPH) [EC:1.8.1.9]
MNF30_00825	lgt	WP_020863008.1	sp|Q8EWA4|LGT_MYCPE	COG0682	K13292//lgt; phosphatidylglycerol---prolipoprotein diacylglyceryl transferase [EC:2.5.1.145]
MNF30_00830	hprK	WP_017698093.1	sp|P61325|HPRK_MYCMS	COG1493	K06023//hprK; HPr kinase/phosphorylase [EC:2.7.11.- 2.7.4.-]
MNF30_00840	folC	WP_013729941.1	sp|Q05865|FOLC_BACSU	COG0285	K11754//folC; dihydrofolate synthase / folylpolyglutamate synthase [EC:6.3.2.12 6.3.2.17]
MNF30_00845	uvrA	WP_020863011.1	sp|Q8EUL1|UVRA_MYCPE	COG0178	K03701//uvrA; excinuclease ABC subunit A
MNF30_00850	uvrB	KEZ17397.1	sp|Q6MS38|UVRB_MYCMS	COG0556	K03702//uvrB; excinuclease ABC subunit B
MNF30_00870	UU017	WP_020863015.1	sp|Q9PRC8|Y017_UREPA	COG0084	K03424//tatD; TatD DNase family protein [EC:3.1.21.-]
MNF30_00890	prs	WP_017698084.1	sp|Q49V09|KPRS_STAS1	COG0462	K00948//PRPS; ribose-phosphate pyrophosphokinase [EC:2.7.6.1]
MNF30_00895	pth	WP_017698083.1	sp|Q6MS28|PTH_MYCMS	COG0193	K01056//PTH1; peptidyl-tRNA hydrolase, PTH1 family [EC:3.1.1.29]
MNF30_00900	rplI	WP_013729932.1	sp|Q6MS27|RL9_MYCMS	COG0359	K02939//RP-L9; large subunit ribosomal protein L9
MNF30_00905	dnaC	WP_013729931.1	sp|P37469|DNAC_BACSU	COG0305	K02314//dnaB; replicative DNA helicase [EC:3.6.4.12]
MNF30_00920	cysS	WP_013729928.1	sp|Q6MS23|SYC_MYCMS	COG0215	K01883//CARS; cysteinyl-tRNA synthetase [EC:6.1.1.16]
MNF30_00925	BB_0516	WP_020863021.1	sp|O51468|Y516_BORBU	COG0566	K03218//rlmB; 23S rRNA (guanosine2251-2'-O)-methyltransferase [EC:2.1.1.185]
MNF30_00930	rpmG2	WP_013729926.1	sp|P51415|RL332_MYCCT	COG0267	K02913//RP-L33; large subunit ribosomal protein L33
MNF30_00940	nusG	WP_013729924.1	sp|Q2G0P2|NUSG_STAA8	COG0250	K02601//nusG; transcription termination/antitermination protein NusG
MNF30_00955	BOV_A0351	ADR24461.1	sp|A5VU90|Y2551_BRUO2	COG0601	K15581//oppB; oligopeptide transport system permease protein
MNF30_00960	amiD	WP_020863025.1	sp|P0A4M9|AMID_STRPN	COG1173	K15582//oppC; oligopeptide transport system permease protein
MNF30_00965	amiE	WP_020863026.1	sp|P0A2U8|AMIE_STRPN	COG0444	K15583//oppD; oligopeptide transport system ATP-binding protein
MNF30_00970	oppF	WP_017698071.1	sp|Q8P2L5|OPPF_STRP8	COG1124	K10823//oppF; oligopeptide transport system ATP-binding protein
MNF30_00985	glf	WP_020863003.1	sp|P75499|GLF_MYCPN	COG0562	K01854//glf; UDP-galactopyranose mutase [EC:5.4.99.9]
MNF30_00990	galE	WP_020863002.1	sp|Q7WTB1|GALE_LACHE	COG1087	K01784//galE; UDP-glucose 4-epimerase [EC:5.1.3.2]
MNF30_01000	rplK	WP_011167140.1	sp|P62437|RL11_MYCMS	COG0080	K02867//RP-L11; large subunit ribosomal protein L11
MNF30_01005	rplA	WP_013729913.1	sp|Q6MRY7|RL1_MYCMS	COG0081	K02863//RP-L1; large subunit ribosomal protein L1
MNF30_01010	rplJ	WP_013729912.1	sp|Q2ST51|RL10_MYCCT	COG0244	K02864//RP-L10; large subunit ribosomal protein L10
MNF30_01015	rplL	WP_011167151.1	sp|Q6MRX7|RL7_MYCMS	COG0222	K02935//RP-L7; large subunit ribosomal protein L7/L12
MNF30_01025	rpoB	WP_017698238.1	sp|Q6MRX6|RPOB_MYCMS	COG0085	K03043//rpoB; DNA-directed RNA polymerase subunit beta [EC:2.7.7.6]
MNF30_01030	rpoC	WP_017698239.1	sp|Q6MRX5|RPOC_MYCMS	COG0086	K03046//rpoC; DNA-directed RNA polymerase subunit beta' [EC:2.7.7.6]
MNF30_01045	rpiB	WP_013729905.1	sp|P53527|RPIB_MYCPN	COG0698	K01808//rpiB; ribose 5-phosphate isomerase B [EC:5.3.1.6]
MNF30_01050	glyA	WP_013729904.1	sp|Q6MS85|GLYA_MYCMS	COG0112	K00600//glyA; glycine hydroxymethyltransferase [EC:2.1.2.1]
MNF30_01055	upp	WP_017698243.1	sp|Q6MS86|UPP_MYCMS	COG0035	K00761//upp; uracil phosphoribosyltransferase [EC:2.4.2.9]
MNF30_01065	atpB	WP_013729901.1	sp|P33251|ATP6_MYCGA	COG0356	K02108//ATPF0A; F-type H+-transporting ATPase subunit a
MNF30_01070	atpE	WP_017698245.1	sp|Q6MS89|ATPL_MYCMS	COG0636	K02110//ATPF0C; F-type H+-transporting ATPase subunit c
MNF30_01080	atpH	WP_017698247.1	sp|Q6MS91|ATPD_MYCMS	COG0712	K02113//ATPF1D; F-type H+-transporting ATPase subunit delta
MNF30_01085	atpA	WP_013729897.1	sp|Q6MS92|ATPA_MYCMS	COG0056	K02111//ATPF1A; F-type H+/Na+-transporting ATPase subunit alpha [EC:7.1.2.2 7.2.2.1]
MNF30_01090	atpG	WP_013729896.1	sp|Q6MS93|ATPG_MYCMS	COG0224	K02115//ATPF1G; F-type H+-transporting ATPase subunit gamma
MNF30_01095	atpD	WP_013729895.1	sp|Q6MS94|ATPB_MYCMS	COG0055	K02112//ATPF1B; F-type H+/Na+-transporting ATPase subunit beta [EC:7.1.2.2 7.2.2.1]
MNF30_01110	mgtA	WP_020862987.1	sp|P0ABB9|ATMA_ECO57	COG0474	K01531//mgtA; P-type Mg2+ transporter [EC:7.2.2.14]
MNF30_01125	glk	WP_013729890.1	sp|Q9X1I0|GLK_THEMA	COG1940	K00845//glk; glucokinase [EC:2.7.1.2]
MNF30_01150	smpB	WP_013729885.1	sp|Q2ST23|SSRP_MYCCT	COG0691	K03664//smpB; SsrA-binding protein
MNF30_01155	rnr	WP_013729884.1	sp|Q98QL0|RNR_MYCPU	COG0557	K12573//rnr; ribonuclease R [EC:3.1.13.1]
MNF30_01165	nrdF	WP_013729882.1	sp|P75461|RIR2_MYCPN	COG0208	K00526//E1.17.4.1B; ribonucleoside-diphosphate reductase beta chain [EC:1.17.4.1]
MNF30_01170	nrdI	WP_013729881.1	sp|Q6MSC4|NRDI_MYCMS	COG1780	K03647//nrdI; protein involved in ribonucleotide reduction
MNF30_01175	nrdE	EXU60718.1	sp|P78027|RIR1_MYCPN	COG0209	K00525//E1.17.4.1A; ribonucleoside-diphosphate reductase alpha chain [EC:1.17.4.1]
MNF30_01180	purA	WP_017698266.1	sp|Q6MSC7|PURA_MYCMS	COG0104	K01939//purA; adenylosuccinate synthase [EC:6.3.4.4]
MNF30_01185	purB	WP_017698267.1	sp|P72478|PUR8_STRMU	COG0015	K01756//purB; adenylosuccinate lyase [EC:4.3.2.2]
MNF30_01190	hpt	WP_017698268.1	sp|Q8DWM8|HGPRT_STRMU	COG0634	K00760//hprT; hypoxanthine phosphoribosyltransferase [EC:2.4.2.8]
MNF30_01205	mngB	WP_013729870.1	sp|P54746|MNGB_ECOLI	COG0383	K01191//MAN2C1; alpha-mannosidase [EC:3.2.1.24]
MNF30_01210	ptsN	WP_011167001.1	sp|P69829|PTSN_ECOLI	COG1762	K02768//fruB; fructose PTS system EIIA component [EC:2.7.1.202]
MNF30_01220	gmuD	PTD31246.1	sp|O05508|GMUD_BACSU	COG2723	K01223//E3.2.1.86B; 6-phospho-beta-glucosidase [EC:3.2.1.86]
MNF30_01230	HI_0977	WP_011166997.1	sp|P44088|Y977_HAEIN	COG2184	K04095//fic; cell filamentation protein
MNF30_01255	deoD	WP_020862957.1	sp|A2RF09|DEOD_STRPG	COG0813	K03784//deoD; purine-nucleoside phosphorylase [EC:2.4.2.1]
MNF30_01265	agaR	WP_013729857.1	sp|P0ACK4|AGAR_ECO57	COG1349	K03436//fruR2; DeoR family transcriptional regulator, fructose operon transcriptional repressor
MNF30_01270	fruK	WP_017698282.1	sp|O31714|K1PF_BACSU	COG1105	K00882//fruK; 1-phosphofructokinase [EC:2.7.1.56]
MNF30_01275	fruA	WP_039275757.1	sp|P75039|PTF3A_MYCPN	COG1299	K02770//fruA; fructose PTS system EIIBC or EIIC component [EC:2.7.1.202]
MNF30_01280	pdp	WP_020862947.1	sp|Q4L818|PDP_STAHJ	COG0213	K00756//pdp; pyrimidine-nucleoside phosphorylase [EC:2.4.2.2]
MNF30_01285	pgcA	WP_017698285.1	sp|P18159|PGCA_BACSU	COG1109	K01835//pgm; phosphoglucomutase [EC:5.4.2.2]
MNF30_01290	deoC	ADR24057.1	sp|Q2SRA7|DEOC_MYCCT	COG0274	K01619//deoC; deoxyribose-phosphate aldolase [EC:4.1.2.4]
MNF30_01305	gpmI	WP_020862942.1	sp|Q6MSF0|GPMI_MYCMS	COG0696	K15633//gpmI; 2,3-bisphosphoglycerate-independent phosphoglycerate mutase [EC:5.4.2.12]
MNF30_01315	tpiA	ADR24447.1	sp|Q6MSF2|TPIS_MYCMS	COG0149	K01803//TPI; triosephosphate isomerase (TIM) [EC:5.3.1.1]
MNF30_01320	nagB	WP_020862939.1	sp|Q6MSF4|NAGB_MYCMS	COG0363	K02564//nagB; glucosamine-6-phosphate deaminase [EC:3.5.99.6]
MNF30_01405	yjgF	WP_013729837.1	sp|Q8U308|RIDA_PYRFU	COG0251	K09022//ridA; 2-iminobutanoate/2-iminopropanoate deaminase [EC:3.5.99.10]
MNF30_01410	patB	WP_011166960.1	sp|Q08432|CBL_BACSU	COG1168	K14155//patB; cysteine-S-conjugate beta-lyase [EC:4.4.1.13]
MNF30_01425	phnC	WP_013729833.1	sp|P15361|P29_MYCHR	COG3638	K02041//phnC; phosphonate transport system ATP-binding protein [EC:7.3.2.2]
MNF30_01430	p69	WP_013729832.1	sp|P15362|P69_MYCHR	COG3639	K02042//phnE; phosphonate transport system permease protein
MNF30_01465	msrAB	WP_013729822.1	sp|Q93KF3|MSRAB_CAMFE	COG0225	K12267//msrAB; peptide methionine sulfoxide reductase msrA/msrB [EC:1.8.4.11 1.8.4.12]
MNF30_01485	uvrD	WP_017698311.1	sp|P45612|UVRD_MYCCT	COG0210	K03657//uvrD; DNA helicase II / ATP-dependent DNA helicase PcrA [EC:3.6.4.12]
MNF30_01490	ptsH	WP_017698312.1	sp|P45611|PTHP_MYCCT	COG1925	K02784//ptsH; phosphocarrier protein HPr
MNF30_01500	MCAP_0714	WP_017698314.1	sp|P45614|Y714_MYCCT	COG0564	K06179//rluC; 23S rRNA pseudouridine955/2504/2580 synthase [EC:5.4.99.24]
MNF30_01510	ligA	WP_020862914.1	sp|Q6MSK8|DNLJ_MYCMS	COG0272	K01972//E6.5.1.2; DNA ligase (NAD+) [EC:6.5.1.2]
MNF30_01520	gatA	WP_013729811.1	sp|P47345|GATA_MYCGE	COG0154	K02433//gatA; aspartyl-tRNA(Asn)/glutamyl-tRNA(Gln) amidotransferase subunit A [EC:6.3.5.6 6.3.5.7]
MNF30_01525	gatB	WP_013729810.1	sp|P61345|GATB_MYCMS	COG0064	K02434//gatB; aspartyl-tRNA(Asn)/glutamyl-tRNA(Gln) amidotransferase subunit B [EC:6.3.5.6 6.3.5.7]
MNF30_01545	folD	WP_013729807.1	sp|Q6MSL3|FOLD_MYCMS	COG0190	K01491//folD; methylenetetrahydrofolate dehydrogenase (NADP+) / methenyltetrahydrofolate cyclohydrolase [EC:1.5.1.5 3.5.4.9]
MNF30_01590	treB	WP_013729800.1	sp|P36672|PTTBC_ECOLI	COG1263	K02819//treB; trehalose PTS system EIIBC or EIIBCA component [EC:2.7.1.201]
MNF30_01595	treA	ADR24162.1	sp|P39795|TREC_BACSU	COG0366	K01226//treC; trehalose-6-phosphate hydrolase [EC:3.2.1.93]
MNF30_01600	dhaK-1	WP_011166915.1	sp|Q927E6|DHAK1_LISIN	COG2376	K05878//dhaK; phosphoenolpyruvate---glycerone phosphotransferase subunit DhaK [EC:2.7.1.121]
MNF30_01605	rpsJ	WP_013729797.1	sp|Q6MSM5|RS10_MYCMS	COG0051	K02946//RP-S10; small subunit ribosomal protein S10
MNF30_01610	rplC	WP_013729796.1	sp|P10134|RL3_MYCCT	COG0087	K02906//RP-L3; large subunit ribosomal protein L3
MNF30_01615	rplD	WP_013729795.1	sp|P61065|RL4_MYCMS	COG0088	K02926//RP-L4; large subunit ribosomal protein L4
MNF30_01620	rplW	P10140.1	sp|P10140|RL23_MYCCT	COG0089	K02892//RP-L23; large subunit ribosomal protein L23
MNF30_01625	rplB	WP_013729793.1	sp|Q6MSM8|RL2_MYCMS	COG0090	K02886//RP-L2; large subunit ribosomal protein L2
MNF30_01630	rpsS	WP_061104414.1	sp|Q6MSM9|RS19_MYCMS	COG0185	K02965//RP-S19; small subunit ribosomal protein S19
MNF30_01635	rplV	P10139.1	sp|P10139|RL22_MYCCT	COG0091	K02890//RP-L22; large subunit ribosomal protein L22
MNF30_01640	rpsC	P02353.5	sp|P02353|RS3_MYCCT	COG0092	K02982//RP-S3; small subunit ribosomal protein S3
MNF30_01645	rplP	P02415.2	sp|P02415|RL16_MYCCT	COG0197	K02878//RP-L16; large subunit ribosomal protein L16
MNF30_01650	rpmC	WP_013729792.1	sp|P10142|RL29_MYCCT	COG0255	K02904//RP-L29; large subunit ribosomal protein L29
MNF30_01655	rpsQ	AOQ22349.1	sp|P10131|RS17_MYCCT	COG0186	K02961//RP-S17; small subunit ribosomal protein S17
MNF30_01660	rplN	P10137.1	sp|P10137|RL14_MYCCT	COG0093	K02874//RP-L14; large subunit ribosomal protein L14
MNF30_01665	rplX	P10141.1	sp|P10141|RL24_MYCCT	COG0198	K02895//RP-L24; large subunit ribosomal protein L24
MNF30_01670	rplE	WP_013729791.1	sp|Q6MSN8|RL5_MYCMS	COG0094	K02931//RP-L5; large subunit ribosomal protein L5
MNF30_01675	rpsZ	P10130.2	sp|P10130|RS14Z_MYCCT	COG0199	K02954//RP-S14; small subunit ribosomal protein S14
MNF30_01680	rpsH	CAE77349.1	sp|Q6MSN9|RS8_MYCMS	COG0096	K02994//RP-S8; small subunit ribosomal protein S8
MNF30_01685	rplF	WP_011166898.1	sp|Q6MSP0|RL6_MYCMS	COG0097	K02933//RP-L6; large subunit ribosomal protein L6
MNF30_01690	rplR	WP_011166897.1	sp|Q6MSP1|RL18_MYCMS	COG0256	K02881//RP-L18; large subunit ribosomal protein L18
MNF30_01700	rplO	WP_011166895.1	sp|Q6MSP3|RL15_MYCMS	COG0200	K02876//RP-L15; large subunit ribosomal protein L15
MNF30_01705	secY	WP_060954690.1	sp|P10250|SECY_MYCCT	COG0201	K03076//secY; preprotein translocase subunit SecY
MNF30_01710	adk	WP_013729786.1	sp|Q6MSP5|KAD_MYCMS	COG0563	K00939//adk; adenylate kinase [EC:2.7.4.3]
MNF30_01715	map	WP_017698332.1	sp|Q59509|MAP1_MYCCT	COG0024	K01265//map; methionyl aminopeptidase [EC:3.4.11.18]
MNF30_01720	infA	Q2SRH5.1	sp|Q2SRH5|IF1_MYCCT	COG0361	K02518//infA; translation initiation factor IF-1
MNF30_01725	rpmJ	Q48972.2	sp|Q48972|RL36_MYCCT	COG0257	K02919//RP-L36; large subunit ribosomal protein L36
MNF30_01730	rpsM	ACU78929.1	sp|Q2SRH7|RS13_MYCCT	COG0099	K02952//RP-S13; small subunit ribosomal protein S13
MNF30_01735	rpsK	Q2SRH8.1	sp|Q2SRH8|RS11_MYCCT	COG0100	K02948//RP-S11; small subunit ribosomal protein S11
MNF30_01740	rpoA	WP_013729784.1	sp|Q6MSP9|RPOA_MYCMS	COG0202	K03040//rpoA; DNA-directed RNA polymerase subunit alpha [EC:2.7.7.6]
MNF30_01745	rplQ	Q48980.1	sp|Q48980|RL17_MYCCT	COG0203	K02879//RP-L17; large subunit ribosomal protein L17
MNF30_01750	ecfA1	WP_011166888.1	sp|Q6MSQ1|ECFA1_MYCMS	COG1122	K16786//ecfA1; energy-coupling factor transport system ATP-binding protein [EC:3.6.3.-]
MNF30_01755	ecfA2	WP_017698336.1	sp|Q6MSQ2|ECFA2_MYCMS	COG1122	K16787//ecfA2; energy-coupling factor transport system ATP-binding protein [EC:3.6.3.-]
MNF30_01760	ecfT	WP_013729781.1	sp|D3ERJ1|ECFT_STAA4	COG0619	K16785//ecfT; energy-coupling factor transport system permease protein
MNF30_01765	truA	WP_017698338.1	sp|Q6MSQ4|TRUA_MYCMS	COG0101	K06173//truA; tRNA pseudouridine38-40 synthase [EC:5.4.99.12]
MNF30_01775	rplM	WP_011166883.1	sp|Q6MSQ6|RL13_MYCMS	COG0102	K02871//RP-L13; large subunit ribosomal protein L13
MNF30_01780	rpsI	ABC01381.1	sp|Q6F0X3|RS9_MESFL	COG0103	K02996//RP-S9; small subunit ribosomal protein S9
MNF30_01795	leuS	WP_013729775.1	sp|Q6MSR0|SYL_MYCMS	COG0495	K01869//LARS; leucyl-tRNA synthetase [EC:6.1.1.4]
MNF30_01815	Rv1218c	WP_017698346.1	sp|O86311|MEATP_MYCTU	COG1131	K01990//ABC-2.A; ABC-2 type transport system ATP-binding protein
MNF30_01825	ptcA	WP_013729769.1	sp|Q2SRJ4|PTC_MYCCT	COG0078	K13252//ptcA; putrescine carbamoyltransferase [EC:2.1.3.6]
MNF30_01830	ygjI	WP_017698349.1	sp|P42590|YGJI_ECOLI	COG0531	K20265//gadC; glutamate:GABA antiporter
MNF30_01835	aguA	WP_013729767.1	sp|Q6MSR8|AGUA_MYCMS	COG2957	K10536//aguA; agmatine deiminase [EC:3.5.3.12]
MNF30_01840	yqeA	ABQ43189.1	sp|Q46807|ARCL_ECOLI	COG0549	K00926//arcC; carbamate kinase [EC:2.7.2.2]
MNF30_01860	MYPU_3580	WP_011166862.1	sp|Q98QK3|ACPH_MYCPU	COG0236	K02078//acpP; acyl carrier protein
MNF30_01890	pheT	WP_041361975.1	sp|Q4FNH4|SYFB_PELUB	COG0073	K06878//K06878; tRNA-binding protein
MNF30_01900	tyrS	WP_017698355.1	sp|Q6MST3|SYY_MYCMS	COG0162	K01866//YARS; tyrosyl-tRNA synthetase [EC:6.1.1.1]
MNF30_01905	dnaE	WP_017698356.1	sp|Q9PQ74|DPO3A_UREPA	COG0587	K02337//dnaE; DNA polymerase III subunit alpha [EC:2.7.7.7]
MNF30_01910	polA	WP_020862880.1	sp|O34996|DPO1_BACSU	COG0749	K02335//polA; DNA polymerase I [EC:2.7.7.7]
MNF30_01915	mutM	WP_020862879.1	sp|Q9PQ76|FPG_UREPA	COG0266	K10563//mutM; formamidopyrimidine-DNA glycosylase [EC:3.2.2.23 4.2.99.18]
MNF30_01925	dnaI	WP_017698360.1	sp|P06567|DNAI_BACSU	COG1484	K11144//dnaI; primosomal protein DnaI
MNF30_01930	gap	WP_013729753.1	sp|O52631|G3P_CLOAB	COG0057	K00134//GAPDH; glyceraldehyde 3-phosphate dehydrogenase [EC:1.2.1.12]
MNF30_01935	pgk	WP_013729752.1	sp|P62415|PGK_MYCMS	COG0126	K00927//PGK; phosphoglycerate kinase [EC:2.7.2.3]
MNF30_01960	rnj1	WP_020862872.1	sp|Q5HQ80|RNJ1_STAEQ	COG0595	K12574//rnj; ribonuclease J [EC:3.1.-.-]
MNF30_02030	recG	WP_013729721.1	sp|O50224|RECG_ACIFR	COG2865	K03655//recG; ATP-dependent DNA helicase RecG [EC:3.6.4.12]
MNF30_02035	hsdR	EXU60606.1	sp|Q47281|T1RE_ECOLX	COG4096	K01153//hsdR; type I restriction enzyme, R subunit [EC:3.1.21.3]
MNF30_02040	hsdM	WP_017698404.1	sp|Q47282|T1ME_ECOLX	COG0286	K03427//hsdM; type I restriction enzyme M protein [EC:2.1.1.72]
MNF30_02055	MJ1531	WP_151929038.1	sp|Q58926|Y1531_METJA	COG0732	K01154//hsdS; type I restriction enzyme, S subunit [EC:3.1.21.3]
MNF30_02060	fruK	WP_046784160.1	sp|O51575|K1PF_BORBU	COG1105	K00882//fruK; 1-phosphofructokinase [EC:2.7.1.56]
MNF30_02135	atpA2	WP_017698381.1	sp|Q98QB7|ATPA2_MYCPU	COG0056	K02111//ATPF1A; F-type H+/Na+-transporting ATPase subunit alpha [EC:7.1.2.2 7.2.2.1]
MNF30_02140	atpD2	WP_011166794.1	sp|Q98QB6|ATPB2_MYCPU	COG0055	K02112//ATPF1B; F-type H+/Na+-transporting ATPase subunit beta [EC:7.1.2.2 7.2.2.1]
MNF30_02160	MSC_0616	WP_011166792.1	sp|Q6MT00|IXTPA_MYCMS	COG0127	K02428//rdgB; XTP/dITP diphosphohydrolase [EC:3.6.1.66]
MNF30_02165	trmL	WP_017698376.1	sp|P44868|TRML_HAEIN	COG0219	K03216//trmL; tRNA (cytidine/uridine-2'-O-)-methyltransferase [EC:2.1.1.207]
MNF30_02175	clpB	WP_129868697.1	sp|Q97KG0|CLPB_CLOAB	COG0542	K03695//clpB; ATP-dependent Clp protease ATP-binding subunit ClpB
MNF30_02180	hrcA	WP_013729691.1	sp|Q6MT04|HRCA_MYCMS	COG1420	K03705//hrcA; heat-inducible transcriptional repressor
MNF30_02185	grpE	WP_017698373.1	sp|Q6MT05|GRPE_MYCMS	COG0576	K03687//GRPE; molecular chaperone GrpE
MNF30_02190	dnaK	WP_013729689.1	sp|Q2SSB0|DNAK_MYCCT	COG0443	K04043//dnaK; molecular chaperone DnaK
MNF30_02195	dnaJ	WP_017698371.1	sp|Q6MT07|DNAJ_MYCMS	COG0484	K03686//dnaJ; molecular chaperone DnaJ
MNF30_02200	rpsB	WP_015545445.1	sp|Q2SSA8|RS2_MYCCT	COG0052	K02967//RP-S2; small subunit ribosomal protein S2
MNF30_02205	tsf	WP_013729686.1	sp|P61335|EFTS_MYCMS	COG0264	K02357//tsf; elongation factor Ts
MNF30_02215	pyrH	WP_013729684.1	sp|Q2SSA5|PYRH_MYCCT	COG0528	K09903//pyrH; uridylate kinase [EC:2.7.4.22]
MNF30_02220	frr	WP_011166777.1	sp|P61306|RRF_MYCMS	COG0233	K02838//frr; ribosome recycling factor
MNF30_02225	argS	WP_017698369.1	sp|Q6MT14|SYR_MYCMS	COG0018	K01887//RARS; arginyl-tRNA synthetase [EC:6.1.1.19]
MNF30_02255	pheS	WP_013729680.1	sp|Q6MT17|SYFA_MYCMS	COG0016	K01889//FARSA; phenylalanyl-tRNA synthetase alpha chain [EC:6.1.1.20]
MNF30_02260	pheT	WP_020862818.1	sp|Q6MT18|SYFB_MYCMS	COG0072	K01890//FARSB; phenylalanyl-tRNA synthetase beta chain [EC:6.1.1.20]
MNF30_02270	rpmF	Q2SS97.1	sp|Q2SS97|RL32_MYCCT	COG0333	K02911//RP-L32; large subunit ribosomal protein L32
MNF30_02275	mraZ	WP_017697743.1	sp|Q6MT21|MRAZ_MYCMS	COG2001	K03925//mraZ; MraZ protein
MNF30_02280	rsmH	WP_011166769.1	sp|P62473|RSMH_MYCMS	COG0275	K03438//mraW; 16S rRNA (cytosine1402-N4)-methyltransferase [EC:2.1.1.199]
MNF30_02290	ftsZ	WP_129923758.1	sp|Q5HQ06|FTSZ_STAEQ	COG0206	K03531//ftsZ; cell division protein FtsZ
MNF30_02305	ileS	WP_017697737.1	sp|Q6MT28|SYI_MYCMS	COG0060	K01870//IARS; isoleucyl-tRNA synthetase [EC:6.1.1.5]
MNF30_02315	ylyB	WP_017697736.1	sp|Q45480|YLYB_BACSU	COG0564	K06180//rluD; 23S rRNA pseudouridine1911/1915/1917 synthase [EC:5.4.99.23]
MNF30_02325	DCTD	WP_011166759.1	sp|Q5RC69|DCTD_PONAB	COG2131	K01493//comEB; dCMP deaminase [EC:3.5.4.12]
MNF30_02335	acpS	WP_011166756.1	sp|Q6MT35|ACPS_MYCMS	COG0736	K00997//acpS; holo-[acyl-carrier protein] synthase [EC:2.7.8.7]
MNF30_02385	rsmI	WP_013729661.1	sp|P0DF46|RSMI_STRP3	COG0313	K07056//rsmI; 16S rRNA (cytidine1402-2'-O)-methyltransferase [EC:2.1.1.198]
MNF30_02395	rplU	WP_013729659.1	sp|Q2SS76|RL21_MYCCT	COG0261	K02888//RP-L21; large subunit ribosomal protein L21
MNF30_02400	ysxB	WP_011166742.1	sp|P26942|YSXB_BACSU	COG2868	K07584//ysxB; uncharacterized protein
MNF30_02405	rpmA	Q6MT50.1	sp|Q6MT50|RL27_MYCMS	COG0211	K02899//RP-L27; large subunit ribosomal protein L27
MNF30_02410	nanA	WP_017697729.1	sp|Q0I2T8|NANA_HAES1	COG0329	K01639//E4.1.3.3; N-acetylneuraminate lyase [EC:4.1.3.3]
MNF30_02415	nanT	WP_013729657.1	sp|Q5E733|NANT_ALIF1	COG0591	K03307//TC.SSS; solute:Na+ symporter, SSS family
MNF30_02430	nanE	WP_020862798.1	sp|Q6MT55|NANE_MYCMS	COG3010	K01788//nanE; N-acylglucosamine-6-phosphate 2-epimerase [EC:5.1.3.9]
MNF30_02435	SSP1012	WP_017697724.1	sp|Q49YI2|PEPVL_STAS1	COG0624	K01439//dapE; succinyl-diaminopimelate desuccinylase [EC:3.5.1.18]
MNF30_02445	udk	ACU78881.1	sp|A8YU29|URK_LACH4	COG0572	K00876//udk; uridine kinase [EC:2.7.1.48]
MNF30_02455	dinB	WP_013729650.1	sp|B8DBV7|DPO4_LISMH	COG0389	K02346//dinB; DNA polymerase IV [EC:2.7.7.7]
MNF30_02460	yqeH	WP_017697762.1	sp|P54453|YQEH_BACSU	COG1161	K06948//yqeH; 30S ribosome assembly GTPase
MNF30_02475	pdhD	WP_020862790.1	sp|P75393|DLDH_MYCPN	COG1249	K00382//DLD; dihydrolipoamide dehydrogenase [EC:1.8.1.4]
MNF30_02480	ruvB	WP_017697766.1	sp|Q4A6N6|RUVB_MYCS5	COG2255	K03551//ruvB; holliday junction DNA helicase RuvB [EC:3.6.4.12]
MNF30_02525	nagA	WP_020862783.1	sp|Q84F86|NAGA_LYSSH	COG1820	K01443//nagA; N-acetylglucosamine-6-phosphate deacetylase [EC:3.5.1.25]
MNF30_02530	ldh	WP_013729636.1	sp|P62054|LDH_MYCMS	COG0039	K00016//LDH; L-lactate dehydrogenase [EC:1.1.1.27]
MNF30_02540	metN1	WP_017697777.1	sp|Q13VD7|METN1_PARXL	COG4586	K01990//ABC-2.A; ABC-2 type transport system ATP-binding protein
MNF30_02545	rbsA	WP_017697777.1	sp|Q02XM9|RBSA_LACLS	COG1121	K01990//ABC-2.A; ABC-2 type transport system ATP-binding protein
MNF30_02575	SpyM50867	WP_017697783.1	sp|P0DN69|GCVHL_STRPG	COG0509	K02437//gcvH; glycine cleavage system H protein
MNF30_02585	SAV0327	WP_011166709.1	sp|A0A0H3JX98|LPLA2_STAAM	COG0095	K03800//lplA; lipoate---protein ligase [EC:6.3.1.20]
MNF30_02615	potA	WP_013729617.1	sp|Q4A5Q4|POTA_MYCS5	COG3839	K10112//msmX; multiple sugar transport system ATP-binding protein
MNF30_02625	yrrC	WP_013729615.1	sp|O34481|RECDL_BACSU	COG0507	K03581//recD; exodeoxyribonuclease V alpha subunit [EC:3.1.11.5]
MNF30_02630	parC	WP_017697793.1	sp|P72525|PARC_STRPN	COG0188	K02621//parC; topoisomerase IV subunit A [EC:5.6.2.2]
MNF30_02635	parE	WP_129905984.1	sp|P50028|PARE_MYCCT	COG0187	K02622//parE; topoisomerase IV subunit B [EC:5.6.2.2]
MNF30_02640	gapN	WP_020862762.1	sp|Q59931|GAPN_STRMU	COG1012	K00131//gapN; glyceraldehyde-3-phosphate dehydrogenase (NADP+) [EC:1.2.1.9]
MNF30_02645	ysgA	WP_013729611.1	sp|P94538|YSGA_BACSU	COG0566	K03437//spoU; RNA methyltransferase, TrmH family
MNF30_02660	pgi	WP_017697798.1	sp|Q6MTA3|G6PI_MYCMS	COG0166	K01810//GPI; glucose-6-phosphate isomerase [EC:5.3.1.9]
MNF30_02670	HI_0858	WP_020862756.1	sp|P44905|5FCL_HAEIN	COG0212	K01934//MTHFS; 5-formyltetrahydrofolate cyclo-ligase [EC:6.3.3.2]
MNF30_02680	csd	WP_020862754.1	sp|Q9PQ36|CSD_UREPA	COG0520	K11717//sufS; cysteine desulfurase / selenocysteine lyase [EC:2.8.1.7 4.4.1.16]
MNF30_02695	MG132	ADR23850.1	sp|P47378|YHIT_MYCGE	COG0537	K02503//HINT1; histidine triad (HIT) family protein
MNF30_02700	yhaM	WP_107669715.1	sp|C5D6L2|YHAM_GEOSW	COG3481	K03698//cbf; 3'-5' exoribonuclease [EC:3.1.-.-]
MNF30_02705	ung	WP_107669713.1	sp|P57280|UNG_BUCAI	COG0692	K03648//UNG; uracil-DNA glycosylase [EC:3.2.2.27]
MNF30_02710	manA	ADR24535.1	sp|O31646|MANA1_BACSU	COG1482	K01809//manA; mannose-6-phosphate isomerase [EC:5.3.1.8]
MNF30_02715	trmFO2	WP_020862747.1	sp|Q6MTB4|TMFO2_MYCMS	COG1206	K04094//trmFO; methylenetetrahydrofolate--tRNA-(uracil-5-)-methyltransferase [EC:2.1.1.74]
MNF30_02720	CUTC	WP_013729597.1	sp|Q9NTM9|CUTC_HUMAN	COG3142	K06201//cutC; copper homeostasis protein
MNF30_02725	metK	WP_013729596.1	sp|Q6MTB6|METK_MYCMS	COG0192	K00789//metK; S-adenosylmethionine synthetase [EC:2.5.1.6]
MNF30_02730	ymdB	WP_017697809.1	sp|O31775|YMDB_BACSU	COG1692	K09769//K09769; uncharacterized protein
MNF30_02735	MCAP_0480	WP_013729594.1	sp|O05290|P13_MYCMY	COG2739	K09787//K09787; uncharacterized protein
MNF30_02740	ftsY	WP_013729593.1	sp|Q6MTB9|FTSY_MYCMS	COG0552	K03110//ftsY; fused signal recognition particle receptor
MNF30_02750	pstB	WP_013729591.1	sp|Q2SS06|PSTB_MYCCT	COG1117	K02036//pstB; phosphate transport system ATP-binding protein [EC:7.3.2.1]
MNF30_02755	pstA	WP_017697811.1	sp|P75185|PSTA_MYCPN	COG0581	K02037//pstC; phosphate transport system permease protein
MNF30_02775	rpmB	Q2SS02.1	sp|Q2SS02|RL28_MYCCT	COG0227	K02902//RP-L28; large subunit ribosomal protein L28
MNF30_02785	yloV	WP_013729585.1	sp|O34751|YLOV_BACSU	COG1461	K07030//K07030; uncharacterized protein
MNF30_02790	plsX	WP_011166664.1	sp|Q6MTC8|PLSX_MYCMS	COG0416	K03621//plsX; phosphate acyltransferase [EC:2.3.1.274]
MNF30_02795	rnc	WP_013729583.1	sp|Q6MTC9|RNC_MYCMS	COG0571	K03685//rnc; ribonuclease III [EC:3.1.26.3]
MNF30_02820	MJECL24	WP_013729375.1	sp|Q60283|Y3524_METJA	COG1192	K03496//parA; chromosome partitioning protein
MNF30_02845	smc	WP_017697817.1	sp|P47540|SMC_MYCGE	COG1196	K03529//smc; chromosome segregation protein
MNF30_02850	spoT	WP_017697818.1	sp|O34098|SPOT_SPICI	COG0317	K01139//spoT; GTP diphosphokinase / guanosine-3',5'-bis(diphosphate) 3'-diphosphatase [EC:2.7.6.5 3.1.7.2]
MNF30_02855	apt	WP_020862735.1	sp|Q6MTD4|APT_MYCMS	COG0503	K00759//APRT; adenine phosphoribosyltransferase [EC:2.4.2.7]
MNF30_02870	cshB	WP_046784093.1	sp|P54475|CSHB_BACSU	COG0513	K18692//cshB; ATP-dependent RNA helicase CshB [EC:3.6.4.13]
MNF30_02875	MYPU_4560	WP_017697823.1	sp|Q98QB0|GCH1L_MYCPU	COG0327	K22391//E3.5.4.16; GTP cyclohydrolase I [EC:3.5.4.16]
MNF30_02880	trmK	WP_017697824.1	sp|P54471|TRMK_BACSU	COG2384	K06967//trmK; tRNA (adenine22-N1)-methyltransferase [EC:2.1.1.217]
MNF30_02885	sigA	ACU78430.1	sp|O66381|SIGA_BACHD	COG0568	K03086//rpoD; RNA polymerase primary sigma factor
MNF30_02890	dnaG	WP_060954655.1	sp|Q6G904|DNAG_STAAS	COG0358	K02316//dnaG; DNA primase [EC:2.7.7.101]
MNF30_02895	glyQS	WP_017697826.1	sp|Q6MTE4|SYG_MYCMS	COG0423	K01880//GARS; glycyl-tRNA synthetase [EC:6.1.1.14]
MNF30_02905	era	WP_017697828.1	sp|Q5WHD9|ERA_BACSK	COG1159	K03595//era; GTPase
MNF30_02910	ybeY	WP_013729566.1	sp|Q6MTE7|YBEY_MYCMS	COG0319	K07042//ybeY; probable rRNA maturation factor
MNF30_02920	DJ1B	WP_013729564.1	sp|Q9MAH3|DJ1B_ARATH	COG0693	K03152//thiJ; protein deglycase [EC:3.5.1.124]
MNF30_02950	lon	WP_017697837.1	sp|Q6MTF4|LON_MYCMS	COG0466	K01338//lon; ATP-dependent Lon protease [EC:3.4.21.53]
MNF30_02955	tig	WP_013729557.1	sp|Q6MTF5|TIG_MYCMS	COG0544	K03545//tig; trigger factor
MNF30_02965	efp	WP_011166635.1	sp|Q6MTF7|EFP_MYCMS	COG0231	K02356//efp; elongation factor P
MNF30_02970	fmt	WP_020862719.1	sp|Q6MTF8|FMT_MYCMS	COG0223	K00604//MTFMT; methionyl-tRNA formyltransferase [EC:2.1.2.9]
MNF30_02985	mnmA	EXU60395.1	sp|Q2SRW8|MNMA_MYCCT	COG0482	K00566//mnmA; tRNA-uridine 2-sulfurtransferase [EC:2.8.1.13]
MNF30_03015	mtnN	WP_020862711.1	sp|Q65GT9|MTNN_BACLD	COG0775	K01243//mtnN; adenosylhomocysteine nucleosidase [EC:3.2.2.9]
MNF30_03020	MG240	WP_020862710.1	sp|P47482|Y240_MYCGE	COG1713	K00969//nadD; nicotinate-nucleotide adenylyltransferase [EC:2.7.7.18]
MNF30_03030	nadE	WP_013729542.1	sp|Q6F0U4|NADE_MESFL	COG0171	K01916//nadE; NAD+ synthase [EC:6.3.1.5]
MNF30_03035	obg	WP_017697852.1	sp|Q2SRV9|OBG_MYCCT	COG0536	K03979//obgE; GTPase [EC:3.6.5.-]
MNF30_03060	MDR1	WP_013729537.1	sp|Q06034|MDR1_LEIEN	COG1132	K06147//ABCB-BAC; ATP-binding cassette, subfamily B, bacterial
MNF30_03065	ywjA	WP_017697857.1	sp|P45861|YWJA_BACSU	COG1132	K06147//ABCB-BAC; ATP-binding cassette, subfamily B, bacterial
MNF30_03085	rnhB	WP_013729532.1	sp|Q2SRV0|RNH2_MYCCT	COG0164	K03470//rnhB; ribonuclease HII [EC:3.1.26.4]
MNF30_03090	rbgA	WP_013729531.1	sp|Q65JP4|RBGA_BACLD	COG1161	K14540//rbgA; ribosome biogenesis GTPase A
MNF30_03095	rplS	WP_013729530.1	sp|Q2SRU8|RL19_MYCCT	COG0335	K02884//RP-L19; large subunit ribosomal protein L19
MNF30_03100	trmD	WP_017697861.1	sp|Q6MTI1|TRMD_MYCMS	COG0336	K00554//trmD; tRNA (guanine37-N1)-methyltransferase [EC:2.1.1.228]
MNF30_03105	rimM	WP_017697862.1	sp|Q6F0S4|RIMM_MESFL	COG0806	K02860//rimM; 16S rRNA processing protein RimM
MNF30_03110	rpsP	WP_013729527.1	sp|Q2SRU5|RS16_MYCCT	COG0228	K02959//RP-S16; small subunit ribosomal protein S16
MNF30_03115	rlmH	WP_020862695.1	sp|Q2SRU4|RLMH_MYCCT	COG1576	K00783//rlmH; 23S rRNA (pseudouridine1915-N3)-methyltransferase [EC:2.1.1.177]
MNF30_03120	ffh	WP_013729525.1	sp|Q01442|SRP54_MYCMY	COG0541	K03106//SRP54; signal recognition particle subunit SRP54 [EC:3.6.5.4]
MNF30_03125	rny	WP_020862693.1	sp|Q6MTI6|RNY_MYCMS	COG1418	K18682//rny; ribonucrease Y [EC:3.1.-.-]
MNF30_03130	recA	WP_017697866.1	sp|P42446|RECA_MYCMY	COG0468	K03553//recA; recombination protein RecA
MNF30_03135	cinA	CBW54123.1	sp|A7Z4W4|CINA_BACVZ	COG1546	K03743//pncC; nicotinamide-nucleotide amidase [EC:3.5.1.42]
MNF30_03160	recU	WP_017697870.1	sp|B7IPC9|RECU_BACC2	COG3331	K03700//recU; recombination protein U
MNF30_03170	hup1	WP_013729516.1	sp|Q9KDA5|DBH1_BACHD	COG0776	K03530//hupB; DNA-binding protein HU-beta
MNF30_03180	der	WP_013729514.1	sp|Q2SRR7|DER_MYCCT	COG1160	K03977//engA; GTPase
MNF30_03185	cmk	WP_020862685.1	sp|Q6MTJ7|KCY_MYCMS	COG0283	K00945//cmk; CMP/dCMP kinase [EC:2.7.4.25]
MNF30_03200	ppa	WP_020862682.1	sp|P75250|IPYR_MYCPN	COG0221	K01507//ppa; inorganic pyrophosphatase [EC:3.6.1.1]
MNF30_03225	MPN_334	WP_017697881.1	sp|P75444|Y334_MYCPN	COG1131	K01990//ABC-2.A; ABC-2 type transport system ATP-binding protein
MNF30_03305	ssb	WP_020862836.1	sp|Q6GF73|SSB_STAAR	COG0629	K03111//ssb; single-strand DNA-binding protein
MNF30_03380	MJECL24	WP_013729375.1	sp|Q60283|Y3524_METJA	COG1192	K03496//parA; chromosome partitioning protein
MNF30_03405	rluB	WP_013729496.1	sp|P35159|RLUB_BACSU	COG1187	K06178//rluB; 23S rRNA pseudouridine2605 synthase [EC:5.4.99.22]
MNF30_03410	scpB	WP_011166575.1	sp|Q04IT3|SCPB_STRP2	COG1386	K06024//scpB; segregation and condensation protein B
MNF30_03415	scpA	WP_017697891.1	sp|B9DTS4|SCPA_STRU0	COG1354	K05896//scpA; segregation and condensation protein A
MNF30_03450	recG	EXU60362.1	sp|O50224|RECG_ACIFR	COG2865	K03655//recG; ATP-dependent DNA helicase RecG [EC:3.6.4.12]
MNF30_03475	MYPE400	WP_013729481.1	sp|Q8EX10|Y040_MYCPE	COG3763	K09976//K09976; uncharacterized protein
MNF30_03480	tkt	WP_017697904.1	sp|P45694|TKT_BACSU	COG0021	K00615//E2.2.1.1; transketolase [EC:2.2.1.1]
MNF30_03495	trmFO1	WP_013729478.1	sp|Q6MTM6|TMFO1_MYCMS	COG1206	K04094//trmFO; methylenetetrahydrofolate--tRNA-(uracil-5-)-methyltransferase [EC:2.1.1.74]
MNF30_03520	trpS	WP_017697910.1	sp|Q81TS6|SYW_BACAN	COG0180	K01867//WARS; tryptophanyl-tRNA synthetase [EC:6.1.1.2]
MNF30_03525	pepP	WP_017697911.1	sp|P47566|AMPP_MYCGE	COG0006	K01262//pepP; Xaa-Pro aminopeptidase [EC:3.4.11.9]
MNF30_03530	cdsA	WP_013729470.1	sp|Q49X46|CDSA_STAS1	COG0575	K00981//E2.7.7.41; phosphatidate cytidylyltransferase [EC:2.7.7.41]
MNF30_03535	polC	WP_017697913.1	sp|P13267|DPO3_BACSU	COG2176	K03763//polC; DNA polymerase III subunit alpha, Gram-positive type [EC:2.7.7.7]
MNF30_03550	nusA	WP_039275603.1	sp|Q9KA74|NUSA_BACHD	COG0195	K02600//nusA; transcription termination/antitermination protein NusA
MNF30_03565	infB	WP_020862643.1	sp|Q6MTQ0|IF2_MYCMS	COG0532	K02519//infB; translation initiation factor IF-2
MNF30_03580	rpsO	WP_013729462.1	sp|Q6MTQ2|RS15_MYCMS	COG0184	K02956//RP-S15; small subunit ribosomal protein S15
MNF30_03595	ribF	WP_013729459.1	sp|Q8K9Z1|RIBF_BUCAP	COG0196	K11753//ribF; riboflavin kinase / FMN adenylyltransferase [EC:2.7.1.26 2.7.7.2]
MNF30_03600	truB	WP_011166532.1	sp|Q6MTR0|TRUB_MYCMS	COG0130	K03177//truB; tRNA pseudouridine55 synthase [EC:5.4.99.25]
MNF30_03610	hisS	WP_011166530.1	sp|P62372|SYH_MYCMS	COG0124	K01892//HARS; histidyl-tRNA synthetase [EC:6.1.1.21]
MNF30_03615	aspS	WP_060954636.1	sp|Q6MTR3|SYD_MYCMS	COG0173	K01876//aspS; aspartyl-tRNA synthetase [EC:6.1.1.12]
MNF30_03640	proS	WP_013729450.1	sp|Q6MTR9|SYP_MYCMS	COG0442	K01881//PARS; prolyl-tRNA synthetase [EC:6.1.1.15]
MNF30_03660	manP	WP_017697931.1	sp|O31645|PTN3B_BACSU	COG1299	K02770//fruA; fructose PTS system EIIBC or EIIC component [EC:2.7.1.202]
MNF30_03690	MG208	WP_129922553.1	sp|P47450|Y208_MYCGE	COG1214	K14742//tsaB; tRNA threonylcarbamoyladenosine biosynthesis protein TsaB
MNF30_03695	tsaE	EXU60273.1	sp|O67011|TSAE_AQUAE	COG0802	K06925//tsaE; tRNA threonylcarbamoyladenosine biosynthesis protein TsaE
MNF30_03710	CPE1738	WP_013729382.1	sp|Q8XJL8|PKN2_CLOPE	COG0515	K12132//prkC; eukaryotic-like serine/threonine-protein kinase [EC:2.7.11.1]
MNF30_03715	rsgA2	WP_011166503.1	sp|Q8ER21|RSGA2_OCEIH	COG1162	K06949//rsgA; ribosome biogenesis GTPase / thiamine phosphate phosphatase [EC:3.6.1.- 3.1.3.100]
MNF30_03720	rpe	WP_020862619.1	sp|O34557|RPE_BACSU	COG0036	K01783//rpe; ribulose-phosphate 3-epimerase [EC:5.1.3.1]
MNF30_03730	valS	WP_017697943.1	sp|Q6MTU2|SYV_MYCMS	COG0525	K01873//VARS; valyl-tRNA synthetase [EC:6.1.1.9]
MNF30_03735	nadK	WP_020862616.1	sp|Q74KC7|NADK_LACJO	COG0061	K00858//ppnK; NAD+ kinase [EC:2.7.1.23]
MNF30_03745	rnj2	WP_013729389.1	sp|Q5HPR6|RNJ2_STAEQ	COG0595	K12574//rnj; ribonuclease J [EC:3.1.-.-]
MNF30_03760	uvrC	WP_017697949.1	sp|Q6MTU8|UVRC_MYCMS	COG0322	K03703//uvrC; excinuclease ABC subunit C
MNF30_03765	greA	WP_017697950.1	sp|Q6MTU9|GREA_MYCMS	COG0782	K03624//greA; transcription elongation factor GreA
MNF30_03795	engB	WP_013729399.1	sp|Q6MTV5|ENGB_MYCMS	COG0218	K03978//engB; GTP-binding protein
MNF30_03800	BCE_0519	WP_020862606.1	sp|Q73E41|BACA1_BACC1	COG0474	K01537//ATP2C; P-type Ca2+ transporter type 2C [EC:7.2.2.10]
MNF30_03840	thiI	WP_020862600.1	sp|B1AJ58|THII_UREP2	COG0301	K03151//thiI; tRNA uracil 4-sulfurtransferase [EC:2.8.1.4]
MNF30_03850	rpsD	WP_011166475.1	sp|Q6MTW7|RS4_MYCMS	COG0522	K02986//RP-S4; small subunit ribosomal protein S4
MNF30_03855	dhaM	WP_129924438.1	sp|P0DN88|DHAM_PROSM	COG3412	K05881//dhaM; phosphoenolpyruvate---glycerone phosphotransferase subunit DhaM [EC:2.7.1.121]
MNF30_03860	MCAP_0235	WP_017697967.1	sp|P45620|Y235_MYCCT	COG2376	K05879//dhaL; phosphoenolpyruvate---glycerone phosphotransferase subunit DhaL [EC:2.7.1.121]
MNF30_03865	crr	WP_013729410.1	sp|P45618|PTGA_MYCCT	COG2190	K02777//crr; sugar PTS system EIIA component [EC:2.7.1.-]
MNF30_03870	ptsI	WP_020862597.1	sp|P45617|PT1_MYCCT	COG1080	K08483//ptsI; phosphoenolpyruvate-protein phosphotransferase (PTS system enzyme I) [EC:2.7.3.9]
MNF30_03875	coaD	WP_020862596.1	sp|Q6MTX3|COAD_MYCMS	COG0669	K00954//E2.7.7.3A; pantetheine-phosphate adenylyltransferase [EC:2.7.7.3]
MNF30_03885	ackA	WP_017697972.1	sp|Q6MTX5|ACKA_MYCMS	COG0282	K00925//ackA; acetate kinase [EC:2.7.2.1]
MNF30_03890	pta	WP_017697973.1	sp|Q49112|PTAS_MYCCT	COG0280	K00625//E2.3.1.8; phosphate acetyltransferase [EC:2.3.1.8]
MNF30_03895	pdhD	WP_107670178.1	sp|P47513|DLDH_MYCGE	COG1249	K00382//DLD; dihydrolipoamide dehydrogenase [EC:1.8.1.4]
MNF30_03900	pdhC	WP_107670176.1	sp|Q49110|ODP2_MYCCT	COG0508	K00627//DLAT; pyruvate dehydrogenase E2 component (dihydrolipoamide acetyltransferase) [EC:2.3.1.12]
MNF30_03905	pdhB	WP_013729418.1	sp|P47515|ODPB_MYCGE	COG0022	K00162//PDHB; pyruvate dehydrogenase E1 component beta subunit [EC:1.2.4.1]
MNF30_03910	pdhA	WP_129881145.1	sp|P35485|ODPA_ACHLA	COG1071	K00161//PDHA; pyruvate dehydrogenase E1 component alpha subunit [EC:1.2.4.1]
MNF30_03915	lplA	WP_011166461.1	sp|P75394|LPLA_MYCPN	COG0095	K03800//lplA; lipoate---protein ligase [EC:6.3.1.20]
MNF30_03925	thrS	WP_036431134.1	sp|A6U2F0|SYT_STAA2	COG0441	K01868//TARS; threonyl-tRNA synthetase [EC:6.1.1.3]
MNF30_03930	pyk	WP_013729424.1	sp|P78031|KPYK_MYCPN	COG0469	K00873//PK; pyruvate kinase [EC:2.7.1.40]
MNF30_03935	pfkA	WP_017697981.1	sp|Q2SSQ6|PFKA_MYCCT	COG0205	K00850//pfkA; 6-phosphofructokinase 1 [EC:2.7.1.11]
MNF30_03940	MPN_051	WP_013729426.1	sp|P75063|Y051_MYCPN	COG0579	K00111//glpA; glycerol-3-phosphate dehydrogenase [EC:1.1.5.3]
MNF30_03945	glpK	WP_013729427.1	sp|Q2SSQ8|GLPK_MYCCT	COG0554	K00864//glpK; glycerol kinase [EC:2.7.1.30]
MNF30_03950	glpF	WP_017697984.1	sp|P0A3Q8|GLPF_STRR6	COG0580	K02440//GLPF; glycerol uptake facilitator protein
MNF30_03955	hprT	WP_017697985.1	sp|P37472|HGPRT_BACSU	COG0634	K00760//hprT; hypoxanthine phosphoribosyltransferase [EC:2.4.2.8]
MNF30_03970	eno	WP_020862582.1	sp|Q6MTZ2|ENO_MYCMS	COG0148	K01689//ENO; enolase [EC:4.2.1.11]
MNF30_03985	murP	WP_013729434.1	sp|Q9CKN5|PTYBC_PASMU	COG1263	K11192//murP; N-acetylmuramic acid PTS system EIICB component [EC:2.7.1.192]
MNF30_03990	murQ	WP_017697991.1	sp|Q6MTZ7|MURQ_MYCMS	COG2103	K07106//murQ; N-acetylmuramic acid 6-phosphate etherase [EC:4.2.1.126]
MNF30_04010	bipA	WP_017697994.1	sp|O25225|BIPA_HELPY	COG1217	K06207//typA; GTP-binding protein
MNF30_04020	sau96IM	WP_013729350.1	sp|P23737|MTS9_STAAU	COG0270	K00558//DNMT1; DNA (cytosine-5)-methyltransferase 1 [EC:2.1.1.37]
MNF30_04025	rsmB	WP_155267252.1	sp|P94464|RSMB_BACSU	COG0144	K03500//rsmB; 16S rRNA (cytosine967-C5)-methyltransferase [EC:2.1.1.176]
MNF30_04030	gmk	Q2SSR8.1	sp|Q2SSR8|KGUA_MYCCT	COG0194	K00942//E2.7.4.8; guanylate kinase [EC:2.7.4.8]
MNF30_04040	def	WP_017697997.1	sp|Q8ER96|DEF_OCEIH	COG0242	K01462//PDF; peptide deformylase [EC:3.5.1.88]
MNF30_04045	infC	Q6MU22.1	sp|Q6MU22|IF3_MYCMS	COG0290	K02520//infC; translation initiation factor IF-3
MNF30_04050	rpmI	Q2SSS2.1	sp|Q2SSS2|RL35_MYCCT	COG0291	K02916//RP-L35; large subunit ribosomal protein L35
MNF30_04055	rplT	Q2SSS3.1	sp|Q2SSS3|RL20_MYCCT	COG0292	K02887//RP-L20; large subunit ribosomal protein L20
MNF30_04060	potA	Q2SSS4.1	sp|Q2SSS4|POTA_MYCCT	COG3842	K11072//potA; spermidine/putrescine transport system ATP-binding protein [EC:7.6.2.11]
MNF30_04070	potC	WP_011166426.1	sp|P47290|POTC_MYCGE	COG1177	K11070//potC; spermidine/putrescine transport system permease protein
MNF30_04085	ywrB	WP_020862570.1	sp|O05216|YWRB_BACSU	COG2059	K07240//chrA; chromate transporter
MNF30_04090	HI_1038	WP_026133637.1	sp|P44099|Y1038_HAEIN	COG1373	K07133//K07133; uncharacterized protein
MNF30_04095	pepA	WP_036431194.1	sp|P47707|AMPA_MYCSA	COG0260	K01255//CARP; leucyl aminopeptidase [EC:3.4.11.1]
MNF30_04105	pepF	WP_017698005.1	sp|O51264|PEPF_BORBU	COG1164	K08602//pepF; oligoendopeptidase F [EC:3.4.24.-]
MNF30_04115	dexB	WP_017698007.1	sp|Q54796|DEXB_STRPN	COG0366	K01182//IMA; oligo-1,6-glucosidase [EC:3.2.1.10]
MNF30_04120	mdxK	WP_013729333.1	sp|O06993|MALPY_BACSU	COG1554	K00691//mapA; maltose phosphorylase [EC:2.4.1.8]
MNF30_04125	msmK	WP_046783904.1	sp|Q00752|MSMK_STRMU	COG3839	K10112//msmX; multiple sugar transport system ATP-binding protein
MNF30_04130	mdxG	WP_052746323.1	sp|O06991|MDXG_BACSU	COG3833	K15772//ganQ; arabinogalactan oligomer / maltooligosaccharide transport system permease protein
MNF30_04135	mdxF	WP_046783903.1	sp|O06990|MDXF_BACSU	COG1175	K15771//ganP; arabinogalactan oligomer / maltooligosaccharide transport system permease protein
MNF30_04150	nplT	WP_020862560.1	sp|P38940|NEPU_GEOSE	COG0366	K01208//cd; cyclomaltodextrinase / maltogenic alpha-amylase / neopullulanase [EC:3.2.1.54 3.2.1.133 3.2.1.135]
MNF30_04155	nplT	WP_020862559.1	sp|P38940|NEPU_GEOSE	COG0366	K01208//cd; cyclomaltodextrinase / maltogenic alpha-amylase / neopullulanase [EC:3.2.1.54 3.2.1.133 3.2.1.135]
MNF30_04160	pgmB	WP_017698016.1	sp|P71447|PGMB_LACLA	COG0637	K01838//pgmB; beta-phosphoglucomutase [EC:5.4.2.6]
MNF30_04180	yafQ	WP_008362621.1	sp|Q47149|YAFQ_ECOLI	COG3041	K19157//yafQ; mRNA interferase YafQ [EC:3.1.-.-]
MNF30_04205	oppF	PTD31106.1	sp|Q8P2L5|OPPF_STRP8	COG4608	K10823//oppF; oligopeptide transport system ATP-binding protein
MNF30_04210	amiE	WP_107670095.1	sp|P0A2U8|AMIE_STRPN	COG0444	K15583//oppD; oligopeptide transport system ATP-binding protein
MNF30_04215	appC	WP_017698021.1	sp|P42063|APPC_BACSU	COG1173	K15582//oppC; oligopeptide transport system permease protein
MNF30_04230	alaS	WP_036455443.1	sp|P61704|SYA_MYCMS	COG0013	K01872//AARS; alanyl-tRNA synthetase [EC:6.1.1.7]
MNF30_04250	mgtE	WP_013729301.1	sp|O34442|MGTE_BACSU	COG2239	K06213//mgtE; magnesium transporter
MNF30_04255	trmB	WP_036455450.1	sp|Q6MU75|TRMB_MYCMS	COG0220	K03439//trmB; tRNA (guanine-N7-)-methyltransferase [EC:2.1.1.33]
MNF30_04265	pepA	WP_020862541.1	sp|P47707|AMPA_MYCSA	COG0260	K01255//CARP; leucyl aminopeptidase [EC:3.4.11.1]
MNF30_04270	yicI	WP_129880286.1	sp|P31434|XYLS_ECOLI	COG1501	K01811//xylS; alpha-D-xyloside xylohydrolase [EC:3.2.1.177]
MNF30_04275	exp5	WP_017698029.1	sp|P35595|PTG3C_STRPN	COG1263	K20108//malT; maltose PTS system EIICB or EIICBA component [EC:2.7.1.208]
MNF30_04280	tuf	Q2SSW8.1	sp|Q2SSW8|EFTU_MYCCT	COG0050	K02358//tuf; elongation factor Tu
MNF30_04285	fusA	WP_013729295.1	sp|Q6MU82|EFG_MYCMS	COG0480	K02355//fusA; elongation factor G
MNF30_04290	rpsG	Q2SSX0.1	sp|Q2SSX0|RS7_MYCCT	COG0049	K02992//RP-S7; small subunit ribosomal protein S7
MNF30_04295	rpsL	Q2SSX1.2	sp|Q2SSX1|RS12_MYCCT	COG0048	K02950//RP-S12; small subunit ribosomal protein S12
MNF30_04300	cls	WP_017698031.1	sp|Q9K8Z4|CLS_BACHD	COG1502	K06131//clsA_B; cardiolipin synthase A/B [EC:2.7.8.-]
MNF30_04325	prmC	WP_017698036.1	sp|Q6MU88|PRMC_MYCMS	COG2890	K02493//hemK; release factor glutamine methyltransferase [EC:2.1.1.297]
MNF30_04330	prfA	WP_020862532.1	sp|Q6MU89|RF1_MYCMS	COG0216	K02835//prfA; peptide chain release factor 1
MNF30_04335	tdk	WP_017698038.1	sp|Q8VVL0|KITH_MYCMS	COG1435	K00857//tdk; thymidine kinase [EC:2.7.1.21]
MNF30_04340	nrnA	WP_017698039.1	sp|Q8DTN6|NRNA_STRMU	COG0618	K06881//nrnA; bifunctional oligoribonuclease and PAP phosphatase NrnA [EC:3.1.3.7 3.1.13.3]
MNF30_04350	rpmE	WP_013729283.1	sp|Q6F0H9|RL31_MESFL	COG0254	K02909//RP-L31; large subunit ribosomal protein L31
MNF30_04375	fba	WP_011166343.1	sp|P75089|ALF_MYCPN	COG0191	K01624//FBA; fructose-bisphosphate aldolase, class II [EC:4.1.2.13]
MNF30_04385	pyrG	WP_011387029.1	sp|Q48965|PYRG_MYCCT	COG0504	K01937//pyrG; CTP synthase [EC:6.3.4.2]
MNF30_04395	ywfO	WP_013729275.1	sp|P39651|YWFO_BACSU	COG1078	K06885//K06885; uncharacterized protein
MNF30_04400	gltX	WP_013729274.1	sp|Q2SSZ1|SYE_MYCCT	COG0008	K09698//gltX; nondiscriminating glutamyl-tRNA synthetase [EC:6.1.1.24]
MNF30_04405	nagE	WP_020862519.1	sp|P09323|PTW3C_ECOLI	COG1263	K02804//nagE; N-acetylglucosamine PTS system EIICBA or EIICB component [EC:2.7.1.193]
MNF30_04420	tdcB	WP_017698055.1	sp|Q2FH01|TDCB_STAA3	COG1171	K01754//E4.3.1.19; threonine dehydratase [EC:4.3.1.19]
MNF30_04425	HI_0454	WP_013729267.1	sp|P44718|Y454_HAEIN	COG0084	K03424//tatD; TatD DNase family protein [EC:3.1.21.-]
MNF30_04435	plsY	EXU60165.1	sp|Q6MUC0|PLSY_MYCMS	COG0344	K08591//plsY; acyl phosphate:glycerol-3-phosphate acyltransferase [EC:2.3.1.275]
MNF30_04445	gtaB	WP_020862510.1	sp|Q05852|GTAB_BACSU	COG1210	K00963//UGP2; UTP--glucose-1-phosphate uridylyltransferase [EC:2.7.7.9]
MNF30_04470	ribF	WP_013729258.1	sp|P44957|RIBF_HAEIN	COG0196	K11753//ribF; riboflavin kinase / FMN adenylyltransferase [EC:2.7.1.26 2.7.7.2]
MNF30_04475	nfo	WP_013729257.1	sp|Q6MUC7|END4_MYCMS	COG0648	K01151//nfo; deoxyribonuclease IV [EC:3.1.21.2]
MNF30_04485	nusB	WP_020862503.1	sp|A7H4Z5|NUSB_CAMJD	COG0781	K03625//nusB; transcription antitermination protein NusB
MNF30_04490	xseA	WP_060954598.1	sp|Q6MUD1|EX7L_MYCMS	COG1570	K03601//xseA; exodeoxyribonuclease VII large subunit [EC:3.1.11.6]
MNF30_04500	tlyA	WP_013729252.1	sp|Q06803|HLYA_BRAHO	COG1189	K06442//tlyA; 23S rRNA (cytidine1920-2'-O)/16S rRNA (cytidine1409-2'-O)-methyltransferase [EC:2.1.1.226 2.1.1.227]
MNF30_04505	coaE	WP_011386955.1	sp|O51497|COAE_BORBU	COG0237	K00859//coaE; dephospho-CoA kinase [EC:2.7.1.24]
MNF30_04515	HI_1038	WP_036431451.1	sp|P44099|Y1038_HAEIN	COG1373	K07133//K07133; uncharacterized protein
