# Supplementary material for: First Report and Comparative Genomic Analysis of a Mycoplasma mycoides Subspecies capri HN-A in Hainan Island
Source: Microorganisms. 2022 Sep 26;10(10):1908. doi: 10.3390/microorganisms10101908 (PMC9607973; doi:10.3390/microorganisms10101908)
Supplement: Supplementary file 1 [file microorganisms-10-01908-s001.zip › Table S4.xlsx]

## Sheet: Sheet1
Table S4. SignalP proteins in Mmc HN-A
Gene_ID	Signal peptide	cleave site	D score	neural_networks
MNF30_00065	Y	19	0.684	SignalP-noTM
MNF30_00070	Y	24	0.618	SignalP-noTM
MNF30_00080	Y	19	0.744	SignalP-noTM
MNF30_00090	Y	24	0.706	SignalP-noTM
MNF30_00095	Y	19	0.614	SignalP-noTM
MNF30_00100	Y	19	0.735	SignalP-noTM
MNF30_00105	Y	24	0.573	SignalP-noTM
MNF30_00145	Y	20,23	0.611	SignalP-noTM
MNF30_00425	Y	25,31	0.598	SignalP-noTM
MNF30_00430	Y	21,31	0.62	SignalP-noTM
MNF30_00435	Y	22	0.644	SignalP-noTM
MNF30_00440	Y	33	0.586	SignalP-noTM
MNF30_00450	Y	21,31	0.585	SignalP-noTM
MNF30_00535	Y	24	0.623	SignalP-noTM
MNF30_00545	Y	24	0.647	SignalP-noTM
MNF30_00550	Y	24	0.681	SignalP-noTM
MNF30_00555	Y	24	0.615	SignalP-noTM
MNF30_00560	Y	24	0.589	SignalP-noTM
MNF30_00570	Y	21	0.607	SignalP-noTM
MNF30_00600	Y	23	0.598	SignalP-noTM
MNF30_00710	Y	20	0.596	SignalP-noTM
MNF30_00720	Y	23	0.876	SignalP-noTM
MNF30_00750	Y	19	0.822	SignalP-noTM
MNF30_00805	Y	24	0.763	SignalP-noTM
MNF30_01035	Y	22	0.633	SignalP-noTM
MNF30_01420	Y	21	0.689	SignalP-noTM
MNF30_01455	Y	27	0.591	SignalP-noTM
MNF30_01460	Y	23	0.604	SignalP-noTM
MNF30_01470	Y	21	0.674	SignalP-noTM
MNF30_01785	Y	21	0.753	SignalP-noTM
MNF30_01805	Y	21	0.661	SignalP-noTM
MNF30_01940	Y	28	0.68	SignalP-noTM
MNF30_02075	Y	18,32	0.61	SignalP-noTM
MNF30_02085	Y	32	0.663	SignalP-noTM
MNF30_02095	Y	18	0.737	SignalP-noTM
MNF30_02130	Y	26	0.648	SignalP-noTM
MNF30_02145	Y	24	0.639	SignalP-noTM
MNF30_02150	Y	24	0.661	SignalP-noTM
MNF30_02155	Y	24	0.673	SignalP-noTM
MNF30_02375	Y	22	0.724	SignalP-noTM
MNF30_02495	Y	20	0.579	SignalP-noTM
MNF30_02500	Y	24	0.597	SignalP-noTM
MNF30_02530	Y	24	0.593	SignalP-noTM
MNF30_02550	Y	22	0.638	SignalP-noTM
MNF30_02595	Y	23,33	0.605	SignalP-noTM
MNF30_02600	Y	24	0.832	SignalP-noTM
MNF30_02685	Y	22	0.772	SignalP-noTM
MNF30_02690	Y	24	0.735	SignalP-noTM
MNF30_02930	Y	24	0.594	SignalP-noTM
MNF30_02935	Y	23,28	0.597	SignalP-noTM
MNF30_02940	Y	21	0.54	SignalP-TM
MNF30_02995	Y	27	0.634	SignalP-noTM
MNF30_03000	Y	19,23	0.572	SignalP-noTM
MNF30_03150	Y	24	0.629	SignalP-noTM
MNF30_03210	Y	24	0.749	SignalP-noTM
MNF30_03215	Y	19,24	0.635	SignalP-noTM
MNF30_03245	Y	26	0.625	SignalP-noTM
MNF30_03260	Y	24	0.64	SignalP-noTM
MNF30_03455	Y	20	0.67	SignalP-noTM
MNF30_03465	Y	24	0.655	SignalP-noTM
MNF30_03590	Y	21	0.81	SignalP-noTM
MNF30_03815	Y	24	0.64	SignalP-noTM
MNF30_03825	Y	23	0.595	SignalP-noTM
MNF30_03880	Y	23	0.585	SignalP-noTM
MNF30_03995	Y	20	0.696	SignalP-noTM
MNF30_04145	Y	24	0.702	SignalP-noTM
MNF30_04170	Y	22	0.668	SignalP-noTM
MNF30_04200	Y	18,22	0.613	SignalP-TM
MNF30_04240	Y	25	0.602	SignalP-noTM
MNF30_04460	Y	24	0.646	SignalP-noTM
