# Supplementary material for: First Report and Comparative Genomic Analysis of a Mycoplasma mycoides Subspecies capri HN-A in Hainan Island
Source: Microorganisms. 2022 Sep 26;10(10):1908. doi: 10.3390/microorganisms10101908 (PMC9607973; doi:10.3390/microorganisms10101908)
Supplement: Supplementary file 1 [file microorganisms-10-01908-s001.zip › Table S5.xlsx]

## Sheet: Sheet1
Table S5. Proteins with transmembrane structure in Mmc HN-A
ID	Length	Topology
MNF30_02130	765	i13-30o705-727i739-761o
MNF30_01805	162	i5-24o128-150i
MNF30_00070	129	o4-23i
MNF30_00435	525	i7-24o
MNF30_01940	162	i7-29o
MNF30_02085	854	i7-29o
MNF30_02095	856	i7-29o
MNF30_02530	318	i7-29o
MNF30_02595	1329	o1301-1323i
MNF30_02600	631	i5-27o
MNF30_02930	819	i7-29o
MNF30_03590	680	o650-672i
MNF30_04460	774	o742-764i
