# Supplementary material for: First Report and Comparative Genomic Analysis of a Mycoplasma mycoides Subspecies capri HN-A in Hainan Island
Source: Microorganisms. 2022 Sep 26;10(10):1908. doi: 10.3390/microorganisms10101908 (PMC9607973; doi:10.3390/microorganisms10101908)
Supplement: Supplementary file 1 [file microorganisms-10-01908-s001.zip › Table S6.xlsx]

## Sheet: Sheet1
Table S6. Secreted proteins in Mmc HN-A
Gene_ID	Signal peptide	cleave site	neural_networks	PredHel	Topology
MNF30_04200	Y	18,22	SignalP-TM	0	o
MNF30_02940	Y	21	SignalP-TM	0	o
MNF30_00720	Y	23	SignalP-noTM	0	o
MNF30_00750	Y	19	SignalP-noTM	0	o
MNF30_02685	Y	22	SignalP-noTM	0	o
MNF30_00805	Y	24	SignalP-noTM	0	o
MNF30_01785	Y	21	SignalP-noTM	0	o
MNF30_03210	Y	24	SignalP-noTM	0	o
MNF30_00080	Y	19	SignalP-noTM	0	o
MNF30_00100	Y	19	SignalP-noTM	0	o
MNF30_02690	Y	24	SignalP-noTM	0	o
MNF30_02375	Y	22	SignalP-noTM	0	o
MNF30_00090	Y	24	SignalP-noTM	0	o
MNF30_04145	Y	24	SignalP-noTM	0	o
MNF30_03995	Y	20	SignalP-noTM	0	o
MNF30_01420	Y	21	SignalP-noTM	0	o
MNF30_00065	Y	19	SignalP-noTM	0	o
MNF30_00550	Y	24	SignalP-noTM	0	o
MNF30_01470	Y	21	SignalP-noTM	0	o
MNF30_02155	Y	24	SignalP-noTM	0	o
MNF30_03455	Y	20	SignalP-noTM	0	o
MNF30_04170	Y	22	SignalP-noTM	0	o
MNF30_02150	Y	24	SignalP-noTM	0	o
MNF30_03465	Y	24	SignalP-noTM	0	o
MNF30_00545	Y	24	SignalP-noTM	0	o
MNF30_03260	Y	24	SignalP-noTM	0	o
MNF30_03815	Y	24	SignalP-noTM	0	o
MNF30_02145	Y	24	SignalP-noTM	0	o
MNF30_02550	Y	22	SignalP-noTM	0	o
MNF30_03215	Y	19,24	SignalP-noTM	0	o
MNF30_02995	Y	27	SignalP-noTM	0	o
MNF30_01035	Y	22	SignalP-noTM	0	o
MNF30_03150	Y	24	SignalP-noTM	0	o
MNF30_03245	Y	26	SignalP-noTM	0	o
MNF30_00535	Y	24	SignalP-noTM	0	o
MNF30_00430	Y	21,31	SignalP-noTM	0	o
MNF30_00555	Y	24	SignalP-noTM	0	o
MNF30_00095	Y	19	SignalP-noTM	0	o
MNF30_00145	Y	20,23	SignalP-noTM	0	o
MNF30_02075	Y	18,32	SignalP-noTM	0	o
MNF30_00570	Y	21	SignalP-noTM	0	o
MNF30_01460	Y	23	SignalP-noTM	0	o
MNF30_04240	Y	25	SignalP-noTM	0	o
MNF30_00425	Y	25,31	SignalP-noTM	0	o
MNF30_00600	Y	23	SignalP-noTM	0	o
MNF30_02500	Y	24	SignalP-noTM	0	o
MNF30_02935	Y	23,28	SignalP-noTM	0	o
MNF30_00710	Y	20	SignalP-noTM	0	o
MNF30_03825	Y	23	SignalP-noTM	0	o
MNF30_01455	Y	27	SignalP-noTM	0	o
MNF30_00560	Y	24	SignalP-noTM	0	o
MNF30_00440	Y	33	SignalP-noTM	0	o
MNF30_00450	Y	21,31	SignalP-noTM	0	o
MNF30_03880	Y	23	SignalP-noTM	0	o
MNF30_02495	Y	20	SignalP-noTM	0	o
MNF30_00105	Y	24	SignalP-noTM	0	o
MNF30_03000	Y	19,23	SignalP-noTM	0	o
