# Supplementary material for: First Report and Comparative Genomic Analysis of a Mycoplasma mycoides Subspecies capri HN-A in Hainan Island
Source: Microorganisms. 2022 Sep 26;10(10):1908. doi: 10.3390/microorganisms10101908 (PMC9607973; doi:10.3390/microorganisms10101908)
Supplement: Supplementary file 1 [file microorganisms-10-01908-s001.zip › Table S7.xlsx]

## Sheet: Sheet1
Table S7. PHI database annotation results of Mmc HN-A
Query_id	Gene	Mutant Phenotype
MNF30_01025	RpoB	reduced virulence
MNF30_00050	secA	reduced virulence
MNF30_01110	MgtB	reduced virulence
MNF30_02950	LonA	reduced virulence
MNF30_00470	gyrA	loss of pathogenicity
MNF30_03870	ptsI	increased virulence (hypervirulence)
MNF30_00640	uhpT	reduced virulence
MNF30_02175	clpA (Dda3937_02363)	reduced virulence
MNF30_03480	Tkt	loss of pathogenicity
MNF30_02630	gyrA	loss of pathogenicity
MNF30_02850	relA	reduced virulence
MNF30_02665	PepO	increased virulence (hypervirulence)
MNF30_01050	glyA	reduced virulence
MNF30_01510	adeN	increased virulence (hypervirulence)
MNF30_01180	PurA	reduced virulence
MNF30_01220	BglA3	reduced virulence
MNF30_03800	PMR1	reduced virulence
MNF30_01930	GAPDH	reduced virulence
MNF30_01185	PurB	reduced virulence
MNF30_01285	PGM	reduced virulence
MNF30_01960	rnjB	reduced virulence
MNF30_03130	recA	reduced virulence
MNF30_00650	MgtB	reduced virulence
MNF30_01465	SpMsrAB2	reduced virulence
MNF30_02725	MGG_00383	reduced virulence
MNF30_04060	potA	reduced virulence
MNF30_04330	MntE	unaffected pathogenicity
MNF30_03930	pykF	reduced virulence
MNF30_03905	pdhB	reduced virulence
MNF30_03125	rny	reduced virulence
MNF30_01705	secY	increased virulence (hypervirulence)
MNF30_03745	rnjB	reduced virulence
MNF30_03895	Rv0462 (lpdC)	increased virulence (hypervirulence)
MNF30_02530	ldh-2	reduced virulence
MNF30_00200	LysX	increased virulence (hypervirulence)
MNF30_03660	fruA1	unaffected pathogenicity
MNF30_02280	rsmH	reduced virulence
MNF30_02435	arcT	reduced virulence
MNF30_04375	FbaA	reduced virulence
MNF30_02870	Lmo1450	increased virulence (hypervirulence)
MNF30_02750	pstB	loss of pathogenicity
MNF30_04445	galU	reduced virulence
MNF30_01840	arcC	reduced virulence
MNF30_00140	GzOB046	unaffected pathogenicity
MNF30_04405	glcA	reduced virulence
MNF30_00890	FTT0673p/prsAp	unaffected pathogenicity
MNF30_02970	FMT	reduced virulence
MNF30_04210	MGA_0220	reduced virulence
MNF30_01275	fruA1	unaffected pathogenicity
MNF30_04115	treS	unaffected pathogenicity
MNF30_02585	lplA1	reduced virulence
MNF30_00775	ptsG	loss of pathogenicity
MNF30_04125	potA	reduced virulence
MNF30_03990	murQ	unaffected pathogenicity
MNF30_00025	hsdR	reduced virulence
MNF30_00695	arcD	reduced virulence
MNF30_01825	argF	unaffected pathogenicity
MNF30_02640	AldB (PSPTO_2673)	reduced virulence
MNF30_00965	MGA_0220	reduced virulence
MNF30_03915	lplA1	reduced virulence
MNF30_03060	LmABCB3	reduced virulence
MNF30_04205	oppF (bb0335)	reduced virulence
MNF30_04275	ptsG	loss of pathogenicity
MNF30_03065	LmABCB3	reduced virulence
MNF30_02885	rpoS	unaffected pathogenicity
MNF30_00990	TcGALE	lethal
MNF30_00320	GzOB006	lethal
MNF30_01200	fruA1	unaffected pathogenicity
MNF30_02475	Rv0462 (lpdC)	increased virulence (hypervirulence)
MNF30_03890	eutD	reduced virulence
MNF30_02845	smc	reduced virulence
MNF30_00820	Trr1	unaffected pathogenicity
MNF30_00970	oppF (bb0335)	reduced virulence
MNF30_00365	VraD	reduced virulence
MNF30_02195	DnaJ	reduced virulence
MNF30_03920	HMPREF0351_12112 (WxL locusA)	reduced virulence
MNF30_01095	bscN	reduced virulence
MNF30_01320	MoDeam	reduced virulence
MNF30_01625	GzOB009	lethal
MNF30_03910	BCKDH	reduced virulence
MNF30_04340	Pde2	reduced virulence
MNF30_00830	HPr	lethal
MNF30_02385	rsmI	reduced virulence
MNF30_02060	fruK	unaffected pathogenicity
MNF30_01595	treS	unaffected pathogenicity
MNF30_04295	GzOB039	unaffected pathogenicity
MNF30_01085	ssaN	reduced virulence
MNF30_00540	hopA1	unaffected pathogenicity
MNF30_00755	hopA1	unaffected pathogenicity
MNF30_00150	cab (NMB0789)	unaffected pathogenicity
MNF30_03865	glcB	reduced virulence
MNF30_02070	MGA_0588	reduced virulence
MNF30_01520	MCC	reduced virulence
MNF30_02140	Flil	reduced virulence
MNF30_01150	smpB	reduced virulence
MNF30_03710	stk	reduced virulence
MNF30_01750	proV	reduced virulence
MNF30_02080	MGA_0588	reduced virulence
MNF30_02090	MGA_0588	reduced virulence
MNF30_00265	guaB (Dda3937_00004)	reduced virulence
MNF30_03900	odhB	unaffected pathogenicity
MNF30_02795	RNase III	reduced virulence
MNF30_01755	potA	reduced virulence
MNF30_02680	fgm3 (FGSG_10993)	reduced virulence
MNF30_01425	MacB	reduced virulence
MNF30_02100	MGA_0588	reduced virulence
MNF30_03765	greA	loss of pathogenicity
MNF30_02615	potA	reduced virulence
MNF30_01155	ClaSSD1	loss of pathogenicity
MNF30_00455	MacB	reduced virulence
MNF30_02030	XC_0537	reduced virulence
MNF30_02190	LHS1	reduced virulence
MNF30_02755	Rv0930	unaffected pathogenicity
MNF30_00195	TrxA	reduced virulence
MNF30_00375	cspE	unaffected pathogenicity
MNF30_01915	Rv2924c	unaffected pathogenicity
MNF30_03450	XC_0537	reduced virulence
MNF30_04220	App	increased virulence (hypervirulence)
MNF30_01815	ABC4	loss of pathogenicity
MNF30_03555	spr0479	lethal
MNF30_04400	GUS1	lethal
MNF30_04430	FepC (VK055_1930)	reduced virulence
MNF30_00510	FasX	reduced virulence
MNF30_03225	oppD (bb0334)	reduced virulence
MNF30_04450	cps2J	reduced virulence
MNF30_01190	XhpT	reduced virulence
MNF30_03740	THR1	reduced virulence
MNF30_03770	THR1	reduced virulence
MNF30_02135	Rho	increased virulence (hypervirulence)
MNF30_01015	Rv0652 (rplL)	increased virulence (hypervirulence)
