# Supplementary material for: First Report and Comparative Genomic Analysis of a Mycoplasma mycoides Subspecies capri HN-A in Hainan Island
Source: Microorganisms. 2022 Sep 26;10(10):1908. doi: 10.3390/microorganisms10101908 (PMC9607973; doi:10.3390/microorganisms10101908)
Supplement: Supplementary file 1 [file microorganisms-10-01908-s001.zip › Table S8.xlsx]

## Sheet: Sheet1
Table S8. VFDB database annotation results for Mmc HN-A
Query_id	Description	VFid	VF_Name	VFCID	VFcategory
MNF30_04280	tuf - translation elongation factor Tu [Mycoplasma mycoides subsp. mycoides SC str. PG1] (CVF587)	VF0877	EF-Tu	VFC0001	Adherence
MNF30_00985	glf - UDP-galactopyranose mutase [Mycoplasma mycoides subsp. mycoides SC str. PG1] (CVF591)	VF0881	Capsule	VFC0258	Immune modulation
MNF30_03905	pdhB - Pyruvate dehydrogenase (lipoamide), beta chain [Mycoplasma mycoides subsp. mycoides SC str. PG1] (CVF588)	VF0878	PDH-B	VFC0001	Adherence
MNF30_00970	oppF - oligopeptide ABC transporter, permease component [Mycoplasma mycoides subsp. mycoides SC str. PG1] (CVF591)	VF0881	Capsule	VFC0258	Immune modulation
MNF30_00990	galE - UDP-glucose 4-epimerase [Mycoplasma mycoides subsp. mycoides SC str. PG1] (CVF591)	VF0881	Capsule	VFC0258	Immune modulation
MNF30_04445	galU - UTP-glucose-1-phosphate uridylyltransferase [Mycoplasma mycoides subsp. mycoides SC str. PG1] (CVF591)	VF0881	Capsule	VFC0258	Immune modulation
MNF30_04455	epsG - Glycosyltransferase [Mycoplasma mycoides subsp. mycoides SC str. PG1] (CVF591)	VF0881	Capsule	VFC0258	Immune modulation
MNF30_00995	epsG - Glycosyltransferase [Mycoplasma mycoides subsp. mycoides SC str. PG1] (CVF591)	VF0881	Capsule	VFC0258	Immune modulation
MNF30_04450	cps - Glycosyltransferase [Mycoplasma mycoides subsp. mycoides SC str. PG1] (CVF591)	VF0881	Capsule	VFC0258	Immune modulation
MNF30_04460	MSC_0992 - hypothetical protein [Mycoplasma mycoides subsp. mycoides SC str. PG1] (CVF591)	VF0881	Capsule	VFC0258	Immune modulation
MNF30_04500	hlyA - hemolysin A [Mycoplasma mycoides subsp. mycoides SC str. PG1] (CVF589)	VF0879	Hemolysin	VFC0235	Exotoxin
MNF30_04440	MSC_0992 - hypothetical protein [Mycoplasma mycoides subsp. mycoides SC str. PG1] (CVF591)	VF0881	Capsule	VFC0258	Immune modulation
MNF30_03970	eno - phosphopyruvate hydratase [Streptococcus agalactiae 2603V/R] (CVF153)	VF1060	Streptococcal enolase	VFC0251	Exoenzyme
MNF30_03455	vmm - Variable surface protein vmm (prolipoprotein) [Mycoplasma mycoides subsp. mycoides SC str. PG1] (CVF594)	VF0331	Surface lipoproteins	VFC0258	Immune modulation
MNF30_00555	vmm - Variable surface protein vmm (prolipoprotein) [Mycoplasma mycoides subsp. mycoides SC str. PG1] (CVF594)	VF0331	Surface lipoproteins	VFC0258	Immune modulation
MNF30_01815	ABC transporter ATP-binding protein, CesC	VF0583	Cereulide	VFC0235	Exotoxin
