# Supplementary material for: First Report and Comparative Genomic Analysis of a Mycoplasma mycoides Subspecies capri HN-A in Hainan Island
Source: Microorganisms. 2022 Sep 26;10(10):1908. doi: 10.3390/microorganisms10101908 (PMC9607973; doi:10.3390/microorganisms10101908)
Supplement: Supplementary file 1 [file microorganisms-10-01908-s001.zip › Table S9.xlsx]

## Sheet: HN-A.CARD
Table S9.CARD database annotation results of Mmc HN-A
ORF_ID	CUT_OFF	ARO	Drug Class	Resistance Mechanism
MNF30_00150	Loose	3003761	macrolide antibiotic; lincosamide antibiotic; streptogramin antibiotic; tetracycline antibiotic; oxazolidinone antibiotic; phenicol antibiotic; pleuromutilin antibiotic	antibiotic target protection
MNF30_00290	Loose	3003445	aminoglycoside antibiotic	antibiotic target alteration
MNF30_00470	Loose	3003995	fluoroquinolone antibiotic	antibiotic target alteration
MNF30_00475	Loose	3004562	fluoroquinolone antibiotic	antibiotic target alteration
MNF30_00610	Loose	3003461	isoniazid	antibiotic target alteration
MNF30_00675	Loose	3003470	aminoglycoside antibiotic	antibiotic target alteration
MNF30_00730	Loose	3003761	macrolide antibiotic; lincosamide antibiotic; streptogramin antibiotic; tetracycline antibiotic; oxazolidinone antibiotic; phenicol antibiotic; pleuromutilin antibiotic	antibiotic target protection
MNF30_00970	Loose	3003761	macrolide antibiotic; lincosamide antibiotic; streptogramin antibiotic; tetracycline antibiotic; oxazolidinone antibiotic; phenicol antibiotic; pleuromutilin antibiotic	antibiotic target protection
MNF30_01025	Loose	3003285	rifamycin antibiotic	antibiotic target alteration; antibiotic target replacement
MNF30_01030	Loose	3003291	peptide antibiotic	antibiotic target alteration
MNF30_01600	Loose	3003394	pyrazinamide	antibiotic target alteration
MNF30_01685	Loose	3003737	fusidic acid	antibiotic target alteration
MNF30_01750	Loose	3003761	macrolide antibiotic; lincosamide antibiotic; streptogramin antibiotic; tetracycline antibiotic; oxazolidinone antibiotic; phenicol antibiotic; pleuromutilin antibiotic	antibiotic target protection
MNF30_01815	Loose	3003761	macrolide antibiotic; lincosamide antibiotic; streptogramin antibiotic; tetracycline antibiotic; oxazolidinone antibiotic; phenicol antibiotic; pleuromutilin antibiotic	antibiotic target protection
MNF30_02540	Loose	3003761	macrolide antibiotic; lincosamide antibiotic; streptogramin antibiotic; tetracycline antibiotic; oxazolidinone antibiotic; phenicol antibiotic; pleuromutilin antibiotic	antibiotic target protection
MNF30_02630	Loose	3003995	fluoroquinolone antibiotic	antibiotic target alteration
MNF30_02635	Loose	3004562	fluoroquinolone antibiotic	antibiotic target alteration
MNF30_02850	Loose	3003369	elfamycin antibiotic	antibiotic target alteration
MNF30_03045	Loose	3003361	elfamycin antibiotic	antibiotic target alteration
MNF30_03065	Loose	3003761	macrolide antibiotic; lincosamide antibiotic; streptogramin antibiotic; tetracycline antibiotic; oxazolidinone antibiotic; phenicol antibiotic; pleuromutilin antibiotic	antibiotic target protection
MNF30_03560	Loose	3003735	fusidic acid	antibiotic target alteration
MNF30_03565	Loose	3003370	elfamycin antibiotic	antibiotic target alteration
MNF30_03625	Loose	3003735	fusidic acid	antibiotic target alteration
MNF30_04010	Loose	3003368	elfamycin antibiotic	antibiotic target alteration
MNF30_04210	Loose	3003761	macrolide antibiotic; lincosamide antibiotic; streptogramin antibiotic; tetracycline antibiotic; oxazolidinone antibiotic; phenicol antibiotic; pleuromutilin antibiotic	antibiotic target protection
MNF30_04280	Loose	3003368	elfamycin antibiotic	antibiotic target alteration
MNF30_04300	Loose	3003092	peptide antibiotic	antibiotic target alteration
MNF30_04430	Loose	3003761	macrolide antibiotic; lincosamide antibiotic; streptogramin antibiotic; tetracycline antibiotic; oxazolidinone antibiotic; phenicol antibiotic; pleuromutilin antibiotic	antibiotic target protection
MNF30_01165	Loose	3003381	fluoroquinolone antibiotic; cephalosporin; glycylcycline; penam; tetracycline antibiotic; rifamycin antibiotic; phenicol antibiotic; triclosan	antibiotic target alteration; antibiotic efflux
MNF30_01415	Loose	3003378	fluoroquinolone antibiotic; cephalosporin; glycylcycline; penam; tetracycline antibiotic; rifamycin antibiotic; phenicol antibiotic; triclosan	antibiotic target alteration; antibiotic efflux
MNF30_01440	Loose	3000506	macrolide antibiotic; fluoroquinolone antibiotic; monobactam; carbapenem; cephalosporin; cephamycin; penam; tetracycline antibiotic; peptide antibiotic; aminocoumarin antibiotic; diaminopyrimidine antibiotic; sulfonamide antibiotic; phenicol antibiotic; penem	antibiotic target alteration; antibiotic efflux
MNF30_01550	Loose	3003381	fluoroquinolone antibiotic; cephalosporin; glycylcycline; penam; tetracycline antibiotic; rifamycin antibiotic; phenicol antibiotic; triclosan	antibiotic target alteration; antibiotic efflux
MNF30_02660	Loose	3004060	macrolide antibiotic; fluoroquinolone antibiotic; aminoglycoside antibiotic; cephalosporin; penam; tetracycline antibiotic; aminocoumarin antibiotic; diaminopyrimidine antibiotic; phenicol antibiotic	antibiotic efflux
MNF30_03210	Loose	3003709	macrolide antibiotic; fluoroquinolone antibiotic; aminoglycoside antibiotic; carbapenem; cephalosporin; cephamycin; penam; tetracycline antibiotic; acridine dye; phenicol antibiotic	antibiotic efflux
MNF30_03710	Loose	3000813	fluoroquinolone antibiotic; diaminopyrimidine antibiotic; phenicol antibiotic	antibiotic efflux
MNF30_03940	Loose	3004060	macrolide antibiotic; fluoroquinolone antibiotic; aminoglycoside antibiotic; cephalosporin; penam; tetracycline antibiotic; aminocoumarin antibiotic; diaminopyrimidine antibiotic; phenicol antibiotic	antibiotic efflux
MNF30_04150	Loose	3003479	tetracycline antibiotic	antibiotic target alteration; antibiotic efflux
MNF30_04365	Loose	3000814	fluoroquinolone antibiotic; diaminopyrimidine antibiotic; phenicol antibiotic	antibiotic efflux
