# Supplementary material for: First Report and Comparative Genomic Analysis of a Mycoplasma mycoides Subspecies capri HN-A in Hainan Island
Source: Microorganisms. 2022 Sep 26;10(10):1908. doi: 10.3390/microorganisms10101908 (PMC9607973; doi:10.3390/microorganisms10101908)
Supplement: Supplementary file 1 [file microorganisms-10-01908-s001.zip › Table S10.xlsx]

## Sheet: GIs
Table S10. Gene islands of Mmc HN-A
GI_ID	Island start	Island end	Length	GeneID	Product
GI_1	136688	156130	19443	MNF30_00530	hypothetical protein
GI_1	136688	156130	19443	MNF30_00535	lipoprotein
GI_1	136688	156130	19443	MNF30_00540	IS3 family transposase
GI_1	136688	156130	19443	MNF30_00545	lipoprotein
GI_1	136688	156130	19443	MNF30_00550	lipoprotein
GI_1	136688	156130	19443	MNF30_00555	lipoprotein
GI_1	136688	156130	19443	MNF30_00560	lipoprotein
GI_1	136688	156130	19443	MNF30_00565	helix-rich protein
GI_1	136688	156130	19443	MNF30_00570	helix-rich protein
GI_1	136688	156130	19443	MNF30_00575	hypothetical protein
GI_1	136688	156130	19443	MNF30_00580	helix-rich protein
GI_1	136688	156130	19443	MNF30_00585	helix-rich protein
GI_1	136688	156130	19443	MNF30_00590	hypothetical protein
GI_1	136688	156130	19443	MNF30_00595	phosphatase PAP2 family protein
GI_2	307955	332290	24336	MNF30_01205	glycosyl hydrolase-related protein
GI_2	307955	332290	24336	MNF30_01210	PTS sugar transporter subunit IIA
GI_2	307955	332290	24336	MNF30_01215	ROK family protein
GI_2	307955	332290	24336	MNF30_01220	glycoside hydrolase family 1 protein
GI_2	307955	332290	24336	MNF30_01225	MupG family TIM beta-alpha barrel fold protein
GI_2	307955	332290	24336	MNF30_01230	Fic family protein
GI_2	307955	332290	24336	MNF30_01235	hypothetical protein
GI_2	307955	332290	24336	MNF30_01240	hypothetical protein
GI_2	307955	332290	24336	MNF30_01245	alpha/beta hydrolase
GI_2	307955	332290	24336	MNF30_01250	transposase
GI_2	307955	332290	24336	MNF30_01255	purine-nucleoside phosphorylase
GI_2	307955	332290	24336	MNF30_01260	hypothetical protein
GI_2	307955	332290	24336	MNF30_01265	DeoR/GlpR family DNA-binding transcription regulator
GI_2	307955	332290	24336	MNF30_01270	1-phosphofructokinase family hexose kinase
GI_2	307955	332290	24336	MNF30_01275	fructose-specific PTS transporter subunit EIIC
GI_2	307955	332290	24336	MNF30_01280	thymidine phosphorylase
GI_2	307955	332290	24336	MNF30_01285	phospho-sugar mutase
