# Supplementary material for: First Report and Comparative Genomic Analysis of a Mycoplasma mycoides Subspecies capri HN-A in Hainan Island
Source: Microorganisms. 2022 Sep 26;10(10):1908. doi: 10.3390/microorganisms10101908 (PMC9607973; doi:10.3390/microorganisms10101908)
Supplement: Supplementary file 1 [file microorganisms-10-01908-s001.zip › Table S11.xlsx]

## Sheet: Sheet1
Table S11 Phosphotransferase system of Mmc HN-A
Locus	Gene
MNF30_03870	ptsI
MNF30_01490	ptsH/frub
MNF30_03865	Crr
MNF30_00775	ptsG
MNF30_00795	Malx
MNF30_00400	mtlA
MNF30_00410	mtlF
MNF30_01210	frua/ptsN
MNF30_01270	fruK
MNF30_01275	fruAb
MNF30_01590	treB
MNF30_02060	fruK
MNF30_03235	UlaB/--
MNF30_03240	Ulac/--
MNF30_03660	fruB/manP
MNF30_03980	SSP0594
MNF30_03985	murP
MNF30_04275	Malt/exp5
MNF30_04405	nagE
