# Supplementary material for: First Report and Comparative Genomic Analysis of a Mycoplasma mycoides Subspecies capri HN-A in Hainan Island
Source: Microorganisms. 2022 Sep 26;10(10):1908. doi: 10.3390/microorganisms10101908 (PMC9607973; doi:10.3390/microorganisms10101908)
Supplement: Supplementary file 1 [file microorganisms-10-01908-s001.zip › Table S12.xlsx]

## Sheet: all_family
Table S12.Specific genes of Mmc HN-A
ORTHOMCL_id	HN-A_list
ORTHOMCL1124	MNF30_00020
ORTHOMCL1125	MNF30_00025
ORTHOMCL1126	MNF30_00070
ORTHOMCL1127	MNF30_00080
ORTHOMCL1128	MNF30_00530
ORTHOMCL1129	MNF30_00975
ORTHOMCL1130	MNF30_00980
ORTHOMCL1131	MNF30_01120
ORTHOMCL1132	MNF30_01395
ORTHOMCL1133	MNF30_01400
ORTHOMCL1134	MNF30_01970
ORTHOMCL1135	MNF30_02010
ORTHOMCL1136	MNF30_02015
ORTHOMCL1137	MNF30_02035
ORTHOMCL1138	MNF30_02050
ORTHOMCL1139	MNF30_02545
ORTHOMCL1140	MNF30_02815
ORTHOMCL1141	MNF30_02820
ORTHOMCL1142	MNF30_02830
ORTHOMCL1143	MNF30_02995
ORTHOMCL1144	MNF30_03000
ORTHOMCL1145	MNF30_03250
ORTHOMCL1146	MNF30_03280
ORTHOMCL1147	MNF30_03310
ORTHOMCL1148	MNF30_03440
ORTHOMCL1149	MNF30_03445
ORTHOMCL1150	MNF30_03980
ORTHOMCL1151	MNF30_04190
ORTHOMCL1152	MNF30_04195
ORTHOMCL1153	MNF30_04515
ORTHOMCL923	MNF30_00015;MNF30_00030
ORTHOMCL924	MNF30_00035;MNF30_02040
ORTHOMCL925	MNF30_02045;MNF30_02055
